# Supplementary material for: The role of apoptosis in spinal cord injury: a bibliometric analysis from 1994 to 2023
Source: Front Cell Neurosci. 2024 Jan 16;17:1334092. doi: 10.3389/fncel.2023.1334092 (PMC10825042; doi:10.3389/fncel.2023.1334092)
Supplement: Supplementary file 7 [file Data_Sheet_1.XLSX]

## Sheet: Supplementary file 1
FN Clarivate Analytics Web of Science
VR 1.0
PT J
AU Tran	AP
Warren	PM
Silver	J
AF Amanda Phuong Tran
Warren	Philippa Mary
Silver	Jerry
TI THE BIOLOGY OF REGENERATION FAILURE AND SUCCESS AFTER SPINAL CORD INJURY
SO PHYSIOLOGICAL REVIEWS
LA English
DT Review
ID CHONDROITIN SULFATE PROTEOGLYCAN; PROTEIN-TYROSINE-PHOSPHATASE;
OLIGODENDROCYTE PRECURSOR CELLS; IMPROVES FUNCTIONAL RECOVERY; PROMOTES
AXON REGENERATION; CELLULAR INFLAMMATORY RESPONSE; NEURAL
STEM/PROGENITOR CELLS; FIBRILLARY ACIDIC PROTEIN; INHIBIT NEURITE
OUTGROWTH; ASTROCYTE SCAR FORMATION
AB Since no approved therapies to restore mobility and sensation following spinal cord injury (SCI) currently exist	a better understanding of the cellular and molecular mechanisms following SCI that compromise regeneration or neuroplasticity is needed to develop new strategies to promote axonal regrowth and restore function. Physical trauma to the spinal cord results in vascular disruption that	in turn	causes blood-spinal cord barrier rupture leading to hemorrhage and ischemia	followed by rampant local cell death. As subsequent edema and inflammation occur	neuronal and glial necrosis and apoptosis spread well beyond the initial site of impact	ultimately resolving into a cavity surrounded by glial/fibrotic scarring. The glial scar	which stabilizes the spread of secondary injury	also acts as a chronic	physical	and chemo-entrapping barrier that prevents axonal regeneration. Understanding the formative events in glial scarring helps guide strategies towards the development of potential therapies to enhance axon regeneration and functional recovery at both acute and chronic stages following SCI. This review will also discuss the perineuronal net and how chondroitin sulfate proteoglycans (CSPGs) deposited …	neuroplasticity/sprouting	and functional recovery following SCI.
C1 Case Western Reserve Univ	Dept Neurosci	Cleveland	OH 44106 USA.
Univ Leeds	Sch Biomed Sci	Leeds	W Yorkshire	England.
C3 Case Western Reserve University; University of Leeds
RP Silver	J (corresponding author)	Case Western Reserve Univ	Dept Neurosci	Sch Med	Robbins E653	10900 Euclid Ave	Cleveland	OH 44106 USA.
EM jxs10@case.edu
OI Warren	Philippa/0000-0002-9910-1156; Tran	Amanda/0000-0002-8393-6124
FU Welcome Trust ISSF Fellowship; University of Leeds; International Spinal
Research Trust; Wings for Life; Neilsen Foundation; National Institute
of Neurological Disorders and Stroke [NS025713]; Hong Kong Spinal Cord
Injury Fund; Brumagin/Nelsen Fund; Kaneko Family Fund
FX P. M. Warren was funded by the Welcome Trust ISSF Fellowship with the
University of Leeds. P. M. Warren and J. Silver were funded by the
International Spinal Research Trust	Wings for Life	and the Neilsen
Foundation. A. P. Tran and J. Silver were funded by National Institute
of Neurological Disorders and Stroke Grant NS025713	The Hong Kong
Spinal Cord Injury Fund	The Brumagin/Nelsen Fund	and The Kaneko Family
Fund.
CR ABNET K	1991	DEV BRAIN RES	V59	P187	DOI 10.1016/0165-3806(91)90099-5
Afshari FT	2010	J NEUROSCI	V30	P4246	DOI 10.1523/JNEUROSCI.3351-09.2010
Agrawal SK	1996	J NEUROSCI	V16	P545
Agrawal SK	2000	NEUROSCIENCE	V99	P179	DOI 10.1016/S0306-4522(00)00165-2
Alilain WJ	2011	NATURE	V475	P196	DOI 10.1038/nature10199
Anderson MA	2016	NATURE	V532	P195	DOI 10.1038/nature17623
Andersson D	2013	PLOS ONE	V8	DOI 10.1371/journal.pone.0070699
Andrews EM	2012	EXP NEUROL	V235	P174	DOI 10.1016/j.expneurol.2011.09.008
Apte SS	2009	J BIOL CHEM	V284	P31493	DOI 10.1074/jbc.R109.052340
Aricescu AR	2002	MOL CELL BIOL	V22	P1881	DOI 10.1128/MCB.22.6.1881-1892.2002
Asher RA	2000	J NEUROSCI	V20	P2427
Asher RA	2002	J NEUROSCI	V22	P2225	DOI 10.1523/JNEUROSCI.22-06-02225.2002
Assinck P	2017	NAT NEUROSCI	V20	P637	DOI 10.1038/nn.4541
Auffray C	2007	SCIENCE	V317	P666	DOI 10.1126/science.1142883
Bachoo RM	2004	P NATL ACAD SCI USA	V101	P8384	DOI 10.1073/pnas.0402140101
BAHR M	1995	EXP NEUROL	V131	P211	DOI 10.1016/0014-4886(95)90043-8
Bai FS	2010	PFLUG ARCH EUR J PHY	V460	P657	DOI 10.1007/s00424-010-0852-y
Baig S	2005	ACTA NEUROPATHOL	V110	P393	DOI 10.1007/s00401-005-1060-2
BALENTINE JD	1978	LAB INVEST	V39	P236
Bao F	2004	J NEUROCHEM	V88	P1335	DOI 10.1046/j.1471-4159.2003.02240.x
Bardehle S	2013	NAT NEUROSCI	V16	P580	DOI 10.1038/nn.3371
Barnabe-Heider F	2010	CELL STEM CELL	V7	P470	DOI 10.1016/j.stem.2010.07.014
BARRETT CP	1981	EXP NEUROL	V73	P365	DOI 10.1016/0014-4886(81)90272-7
Barritt AW	2006	J NEUROSCI	V26	P10856	DOI 10.1523/JNEUROSCI.2980-06.2006
Bartanusz V	2011	ANN NEUROL	V70	P194	DOI 10.1002/ana.22421
Bartus K	2014	J NEUROSCI	V34	P4822	DOI 10.1523/JNEUROSCI.4369-13.2014
Baumann N	2001	PHYSIOL REV	V81	P871	DOI 10.1152/physrev.2001.81.2.871
Bayraktar OA	2015	CSH PERSPECT BIOL	V7	DOI 10.1101/cshperspect.a020362
Beattie MS	2002	NEURON	V36	P375	DOI 10.1016/S0896-6273(02)01005-X
Beck KD	2010	BRAIN	V133	P433	DOI 10.1093/brain/awp322
Beller JA	2013	EXP NEUROL	V247	P143	DOI 10.1016/j.expneurol.2013.02.012
Bergles DE	2000	NATURE	V405	P187	DOI 10.1038/35012083
Bianchi ME	2007	J LEUKOCYTE BIOL	V81	P1	DOI 10.1189/jlb.0306164
Blight A R	1985	Cent Nerv Syst Trauma	V2	P299
Borisoff JF	2003	MOL CELL NEUROSCI	V22	P405	DOI 10.1016/S1044-7431(02)00032-5
BOVOLENTA P	1993	NEUROREPORT	V5	P345	DOI 10.1097/00001756-199312000-00042
Bowes AL	2014	J NEUROTRAUM	V31	P1753	DOI 10.1089/neu.2014.3429
Bowes C	2012	P NATL ACAD SCI USA	V109	P2595	DOI 10.1073/pnas.1121604109
Bradbury EJ	2002	NATURE	V416	P636	DOI 10.1038/416636a
Brambilla R	2005	J EXP MED	V202	P145	DOI 10.1084/jem.20041918
BRESNAHAN JC	1978	J NEUROL SCI	V37	P59	DOI 10.1016/0022-510X(78)90228-9
Brown JM	2012	P NATL ACAD SCI USA	V109	P4768	DOI 10.1073/pnas.1121318109
BRUCKNER G	1993	GLIA	V8	P183	DOI 10.1002/glia.440080306
Bundesen LQ	2003	J NEUROSCI	V23	P7789
BUNGE MB	1994	EXP NEUROL	V127	P76	DOI 10.1006/exnr.1994.1082
BUNGE RP	1993	ADV NEUROL	V59	P75
Busch SA	2011	J NEUROSCI	V31	P944	DOI 10.1523/JNEUROSCI.3566-10.2011
Busch SA	2010	J NEUROSCI	V30	P255	DOI 10.1523/JNEUROSCI.3705-09.2010
Busch SA	2009	J NEUROSCI	V29	P9967	DOI 10.1523/JNEUROSCI.1151-09.2009
Bush TG	1999	NEURON	V23	P297	DOI 10.1016/S0896-6273(00)80781-3
Buss A	2009	BMC NEUROL	V9	DOI 10.1186/1471-2377-9-32
Cafferty WBJ	2008	J NEUROSCI	V28	P11998	DOI 10.1523/JNEUROSCI.3877-08.2008
Cafferty WBJ	2007	J NEUROSCI	V27	P2176	DOI 10.1523/JNEUROSCI.5176-06.2007
Caggiano AO	2005	J NEUROTRAUM	V22	P226	DOI 10.1089/neu.2005.22.226
Cai DM	1999	NEURON	V22	P89	DOI 10.1016/S0896-6273(00)80681-9
Cajal SRY	1959	DEGENERATION REGENER
CANNING DR	1993	EXP NEUROL	V124	P289	DOI 10.1006/exnr.1993.1199
Canning DR	1996	INT J DEV NEUROSCI	V14	P153	DOI 10.1016/0736-5748(96)00004-4
CARBONELL AL	1988	BRAIN RES	V439	P337	DOI 10.1016/0006-8993(88)91491-6
Carlson SL	1998	EXP NEUROL	V151	P77	DOI 10.1006/exnr.1998.6785
Carter LM	2011	EXP NEUROL	V228	P149	DOI 10.1016/j.expneurol.2010.12.023
Carter LM	2008	J NEUROSCI	V28	P14107	DOI 10.1523/JNEUROSCI.2217-08.2008
Casha S	2001	NEUROSCIENCE	V103	P203	DOI 10.1016/S0306-4522(00)00538-8
Celio MR	1998	TRENDS NEUROSCI	V21	P510	DOI 10.1016/S0166-2236(98)01298-3
Chang Eric	2013	Crit Rev Phys Rehabil Med	V25	P11
Chatzipanteli K	2000	J NEUROTRAUM	V17	P321	DOI 10.1089/neu.2000.17.321
Chau CH	2004	FASEB J	V18	P194	DOI 10.1096/fj.03-0196fje
Chauvet N	1998	EXP NEUROL	V151	P1	DOI 10.1006/exnr.1998.6784
Cherry JD	2014	FRONT IMMUNOL	V5	DOI 10.3389/fimmu.2014.00594
Cherry JD	2014	J NEUROINFLAMM	V11	DOI 10.1186/1742-2094-11-98
Chierzi S	2005	EUR J NEUROSCI	V21	P2051	DOI 10.1111/j.1460-9568.2005.04066.x
Chikuda H	2014	EMERG MED J	V31	P201	DOI 10.1136/emermed-2012-202058
Chodobski A	2011	TRANSL STROKE RES	V2	P492	DOI 10.1007/s12975-011-0125-x
Citron BA	2000	EXP NEUROL	V166	P213	DOI 10.1006/exnr.2000.7523
Collyer E	2014	EXP NEUROL	V261	P451	DOI 10.1016/j.expneurol.2014.07.014
Conrad S	2005	J COMP NEUROL	V487	P166	DOI 10.1002/cne.20561
Cregg JM	2014	EXP NEUROL	V253	P197	DOI 10.1016/j.expneurol.2013.12.024
Cua RC	2013	GLIA	V61	P972	DOI 10.1002/glia.22489
Darmanis S	2015	P NATL ACAD SCI USA	V112	P7285	DOI 10.1073/pnas.1507125112
Davalos D	2005	NAT NEUROSCI	V8	P752	DOI 10.1038/nn1472
DAVID S	1981	SCIENCE	V214	P931	DOI 10.1126/science.6171034
David S	2011	NAT REV NEUROSCI	V12	P388	DOI 10.1038/nrn3053
Davies Jeannette E	2006	J Biol	V5	P7	DOI 10.1186/jbiol35
Davies SJA	1997	NATURE	V390	P680	DOI 10.1038/37776
Davies SJA	1999	J NEUROSCI	V19	P5810	DOI 10.1523/JNEUROSCI.19-14-05810.1999
Deepa SS	2006	J BIOL CHEM	V281	P17789	DOI 10.1074/jbc.M600544200
Degryse B	2001	J CELL BIOL	V152	P1197	DOI 10.1083/jcb.152.6.1197
DePaul MA	2015	SCI REP-UK	V5	DOI 10.1038/srep16795
DePaul MA	2015	PLOS ONE	V10	DOI 10.1371/journal.pone.0139335
Dergham P	2002	J NEUROSCI	V22	P6570
Detloff MR	2008	EXP NEUROL	V212	P337	DOI 10.1016/j.expneurol.2008.04.009
DeVivo MJ	2012	SPINAL CORD	V50	P365	DOI 10.1038/sc.2011.178
Dickendesher TL	2012	NAT NEUROSCI	V15	P703	DOI 10.1038/nn.3070
Didangelos A	2016	SCI REP-UK	V6	DOI 10.1038/srep21607
Didangelos A	2014	J NEUROSCI	V34	P16424	DOI 10.1523/JNEUROSCI.2927-14.2014
Dityatev A	2007	DEV NEUROBIOL	V67	P570	DOI 10.1002/dneu.20361
Dore-Duffy P	2000	MICROVASC RES	V60	P55	DOI 10.1006/mvre.2000.2244
DOU CL	1994	J NEUROSCI	V14	P7616
Dubreuil CI	2003	J CELL BIOL	V162	P233	DOI 10.1083/jcb.200301080
Dyck SM	2015	STEM CELLS	V33	P2550	DOI 10.1002/stem.1979
Edgerton VR	2011	EXPERT REV NEUROTHER	V11	P1351	DOI [10.1586/ern.11.129	10.1586/ERN.11.129]
Emsley JG	2006	NEURON GLIA BIOL	V2	P175	DOI 10.1017/S1740925X06000202
Erturk A	2012	NAT PROTOC	V7	P1983	DOI 10.1038/nprot.2012.119
Evaniew N	2016	J NEUROTRAUM	V33	P468	DOI 10.1089/neu.2015.4192
Evans TA	2014	EXP NEUROL	V254	P109	DOI 10.1016/j.expneurol.2014.01.013
Farmer WT	2016	SCIENCE	V351	P849	DOI 10.1126/science.aab3103
Faulkner JR	2004	J NEUROSCI	V24	P2143	DOI 10.1523/JNEUROSCI.3547-03.2004
Fehlings Michael G	2014	Neurosurgery	V61 Suppl 1	P36	DOI 10.1227/NEU.0000000000000412
Fernandez-Klett F	2014	BRAIN PATHOL	V24	P404	DOI 10.1111/bpa.12162
Fidler PS	1999	J NEUROSCI	V19	P8778	DOI 10.1523/JNEUROSCI.19-20-08778.1999
Filous AR	2016	PROG NEUROBIOL	V144	P173	DOI 10.1016/j.pneurobio.2016.03.009
Filous AR	2014	J NEUROSCI	V34	P16369	DOI 10.1523/JNEUROSCI.1309-14.2014
Filous AR	2010	DEV NEUROBIOL	V70	P826	DOI 10.1002/dneu.20820
Fisher D	2011	J NEUROSCI	V31	P14051	DOI 10.1523/JNEUROSCI.1737-11.2011
Fitch MT	2008	EXP NEUROL	V209	P294	DOI 10.1016/j.expneurol.2007.05.014
Fitch MT	1999	J NEUROSCI	V19	P8182
Fleming JC	2006	BRAIN	V129	P3249	DOI 10.1093/brain/awl296
Fouad K	2005	J NEUROSCI	V25	P1169	DOI 10.1523/JNEUROSCI.3562-04.2005
Fouad K	2009	SPINAL CORD	V47	P727	DOI 10.1038/sc.2009.10
Fournier AE	2003	J NEUROSCI	V23	P1416	DOI 10.1523/JNEUROSCI.23-04-01416.2003
Fox AN	2005	CURR BIOL	V15	P1701	DOI 10.1016/j.cub.2005.08.035
Francos-Quijorna I	2016	GLIA	V64	P2079	DOI 10.1002/glia.23041
FRIEDLANDER DR	1994	J CELL BIOL	V125	P669	DOI 10.1083/jcb.125.3.669
Fry EJ	2010	GLIA	V58	P423	DOI 10.1002/glia.20934
Funfschilling U	2012	NATURE	V485	P517	DOI 10.1038/nature11007
Gadani SP	2015	NEURON	V87	P47	DOI 10.1016/j.neuron.2015.05.019
Gadani SP	2015	NEURON	V85	P703	DOI 10.1016/j.neuron.2015.01.013
Gallo V	2008	J PHYSIOL-LONDON	V586	P3767	DOI 10.1113/jphysiol.2008.158436
Galtrey CM	2007	BRAIN	V130	P926	DOI 10.1093/brain/awl372
Gao K	2013	GLIA	V61	P2063	DOI 10.1002/glia.22577
Gao Y	2004	NEURON	V44	P609	DOI 10.1016/j.neuron.2004.10.030
Garcia E	2016	MEDIAT INFLAMM	V2016	DOI 10.1155/2016/9476020
Garcia-Alias G	2009	NAT NEUROSCI	V12	P1145	DOI 10.1038/nn.2377
GarciaAbreu J	1996	GLIA	V17	P339	DOI 10.1002/(SICI)1098-1136(199608)17:4<339::AID-GLIA8>3.0.CO;2-U
Gardner RT	2013	J NEUROSCI	V33	P7175	DOI 10.1523/JNEUROSCI.5866-12.2013
Gensel JC	2009	J NEUROSCI	V29	P3956	DOI 10.1523/JNEUROSCI.3992-08.2009
Geremia NM	2012	J NEUROTRAUM	V29	P539	DOI 10.1089/neu.2011.1976
GERHART KA	1994	ANN EMERG MED	V23	P807	DOI 10.1016/S0196-0644(94)70318-3
Ghosh A	2010	NAT NEUROSCI	V13	P97	DOI 10.1038/nn.2448
Ghosh A	2009	J NEUROSCI	V29	P12210	DOI 10.1523/JNEUROSCI.1828-09.2009
Gogolla N	2009	SCIENCE	V325	P1258	DOI 10.1126/science.1174146
Goritz C	2011	SCIENCE	V333	P238	DOI 10.1126/science.1203165
Greenhalgh AD	2014	J NEUROSCI	V34	P6316	DOI 10.1523/JNEUROSCI.4912-13.2014
Grimpe B	2004	J NEUROSCI	V24	P1393	DOI 10.1523/JNEUROSCI.4986-03.2004
Gris D	2004	J NEUROSCI	V24	P4043	DOI 10.1523/JNEUROSCI.5343-03.2004
Grossman SD	2000	J NEUROCHEM	V75	P174	DOI 10.1046/j.1471-4159.2000.0750174.x
Grossman SD	2001	EXP NEUROL	V168	P273	DOI 10.1006/exnr.2001.7628
GUIMARAES A	1990	J NEUROSCI	V10	P3014
Guimaraes-Camboa N	2017	CELL STEM CELL	V20	P345	DOI 10.1016/j.stem.2016.12.006
Guirado R	2014	INT J NEUROPSYCHOPH	V17	P1635	DOI 10.1017/S1461145714000406
Gwak YS	2009	NEUROSCIENCE	V161	P895	DOI 10.1016/j.neuroscience.2009.03.055
Haas C	2013	J NEUROTRAUM	V30	P1035	DOI 10.1089/neu.2013.2915
Haas C	2012	EXP NEUROL	V233	P717	DOI 10.1016/j.expneurol.2011.11.002
Hackett AR	2016	NEUROBIOL DIS	V89	P10	DOI 10.1016/j.nbd.2016.01.017
Haghighi SS	2000	SPINAL CORD	V38	P733	DOI 10.1038/sj.sc.3101074
Hains BC	2006	J NEUROSCI	V26	P4308	DOI 10.1523/JNEUROSCI.0003-06.2006
Hara M	2017	NAT MED	V23	P818	DOI 10.1038/nm.4354
Harkema SJ	2012	ARCH PHYS MED REHAB	V93	P1508	DOI 10.1016/j.apmr.2011.01.024
HARLAN JM	1987	SEMIN THROMB HEMOST	V13	P434	DOI 10.1055/s-2007-1003520
HARTIG W	1994	BRAIN RES	V635	P307	DOI 10.1016/0006-8993(94)91452-4
Hausmann O	2003	SPINAL CORD	V41	P369	DOI 10.1038/sj.sc.3101483
Hawrylycz MJ	2012	NATURE	V489	P391	DOI 10.1038/nature11405
Hawthorne AL	2011	J NEUROSCI	V31	P5605	DOI 10.1523/JNEUROSCI.6663-10.2011
Hayashi N	2005	NEUROSCIENCE	V131	P331	DOI 10.1016/j.neuroscience.2004.11.017
Herrmann JE	2008	J NEUROSCI	V28	P7231	DOI 10.1523/JNEUROSCI.1709-08.2008
Hesp ZC	2015	J NEUROSCI	V35	P1274	DOI 10.1523/JNEUROSCI.2568-14.2015
Hines DJ	2009	GLIA	V57	P1610	DOI 10.1002/glia.20874
Hochstim C	2008	CELL	V133	P510	DOI 10.1016/j.cell.2008.02.046
Hofmeyer K	2009	P NATL ACAD SCI USA	V106	P19399	DOI 10.1073/pnas.0903961106
HOKE A	1994	EXP NEUROL	V130	P56	DOI 10.1006/exnr.1994.1185
Horky LL	2006	J COMP NEUROL	V498	P525	DOI 10.1002/cne.21065
Horn KP	2008	J NEUROSCI	V28	P9330	DOI 10.1523/JNEUROSCI.2488-08.2008
Horner PJ	2000	J NEUROSCI	V20	P2218
Houle JD	2006	J NEUROSCI	V26	P7405	DOI 10.1523/JNEUROSCI.1166-06.2006
Hu X	2016	BRAIN RES BULL	V125	P1	DOI 10.1016/j.brainresbull.2016.03.017
Huang WJ	2000	ACTA CRYSTALLOGR D	V56	P904	DOI 10.1107/S0907444900005102
Hurtado A	2011	BIOMATERIALS	V32	P6068	DOI 10.1016/j.biomaterials.2011.05.006
IIJIMA N	1991	J NEUROCHEM	V56	P706	DOI 10.1111/j.1471-4159.1991.tb08207.x
Iseda T	2004	NEUROSCIENCE	V126	P365	DOI 10.1016/j.neuroscience.2004.03.056
Iseda T	2008	J NEUROTRAUM	V25	P334	DOI 10.1089/neu.2007.0289
Jahan N	2015	EXP NEUROL	V263	P372	DOI 10.1016/j.expneurol.2014.10.023
JANZER RC	1987	NATURE	V325	P253	DOI 10.1038/325253a0
Jennewein C	2011	MOL MED	V17	P568	DOI 10.2119/molmed.2010.00146
Jin Y	2011	J NEUROSCI METH	V199	P208	DOI 10.1016/j.jneumeth.2011.05.007
Jin YJ	2016	NEURON	V91	P748	DOI 10.1016/j.neuron.2016.07.024
Jones LL	2003	EXP NEUROL	V182	P399	DOI 10.1016/S0014-4886(03)00087-6
Jones LL	2002	J NEUROSCI	V22	P2792	DOI 10.1523/JNEUROSCI.22-07-02792.2002
Joosten EAJ	2004	J NEUROSCI RES	V77	P127	DOI 10.1002/jnr.20088
Kaczmarek L	2002	EMBO J	V21	P6643	DOI 10.1093/emboj/cdf676
Kanemaru K	2013	P NATL ACAD SCI USA	V110	P11612	DOI 10.1073/pnas.1300378110
Kang WF	2014	P NATL ACAD SCI USA	V111	pE2987	DOI 10.1073/pnas.1320401111
Karimi-Abdolrezaee S	2010	J NEUROSCI	V30	P1657	DOI 10.1523/JNEUROSCI.3111-09.2010
Karus M	2016	GLIA	V64	P270	DOI 10.1002/glia.22928
Kataoka A	2009	J NEUROCHEM	V108	P115	DOI 10.1111/j.1471-4159.2008.05744.x
Katori S	2017	J NEUROSCI	V37	P7682	DOI 10.1523/JNEUROSCI.3123-16.2017
Kawabata H	2010	SPINE	V35	P1109	DOI 10.1097/BRS.0b013e3181bd14b6
Keough MB	2016	NAT COMMUN	V7	DOI 10.1038/ncomms11312
Khurana SR	2014	PHYS MED REH CLIN N	V25	P655	DOI 10.1016/j.pmr.2014.04.008
Kigerl KA	2006	J COMP NEUROL	V494	P578	DOI 10.1002/cne.20827
Kigerl KA	2014	EXP NEUROL	V258	P5	DOI 10.1016/j.expneurol.2014.01.001
Kigerl KA	2009	J NEUROSCI	V29	P13435	DOI 10.1523/JNEUROSCI.3257-09.2009
Kim JE	2003	NEURON	V38	P187	DOI 10.1016/S0896-6273(03)00147-8
Kimelberg HK	2010	NEUROTHERAPEUTICS	V7	P338	DOI 10.1016/j.nurt.2010.07.006
Kimura-Kuroda J	2010	MOL CELL NEUROSCI	V43	P177	DOI 10.1016/j.mcn.2009.10.008
Kluppel M	2011	MOL CELL BIOCHEM	V351	P1	DOI 10.1007/s11010-010-0705-1
Kolkman MJM	2004	BEHAV BRAIN RES	V154	P171	DOI 10.1016/j.bbr.2004.02.006
Komitova M	2011	GLIA	V59	P800	DOI 10.1002/glia.21152
Kono H	2008	NAT REV IMMUNOL	V8	P279	DOI 10.1038/nri2215
Koprivica V	2005	SCIENCE	V310	P106	DOI 10.1126/science.1115462
Koyanagi I	1997	NEUROL RES	V19	P289	DOI 10.1080/01616412.1997.11740815
Kroner A	2014	NEURON	V83	P1098	DOI 10.1016/j.neuron.2014.07.027
KRULL CE	1994	J NEUROBIOL	V25	P989	DOI 10.1002/neu.480250808
Kuboyama T	2013	EXP NEUROL	V248	P157	DOI 10.1016/j.expneurol.2013.06.011
Kucharova K	2015	J NEUROINFLAMM	V12	DOI 10.1186/s12974-015-0385-6
Kurimoto T	2010	J NEUROSCI	V30	P15654	DOI 10.1523/JNEUROSCI.4340-10.2010
Kwon MJ	2016	NEURAL REGEN RES	V11	P1368	DOI 10.4103/1673-5374.191194
Laabs TL	2007	J NEUROSCI	V27	P14494	DOI 10.1523/JNEUROSCI.2807-07.2007
Lafortune L	1996	J NEUROPATH EXP NEUR	V55	P515	DOI 10.1097/00005072-199605000-00003
LANDER AD	1982	J CELL BIOL	V94	P574	DOI 10.1083/jcb.94.3.574
Lang BT	2015	NATURE	V518	P404	DOI 10.1038/nature13974
Larsen PH	2003	J NEUROSCI	V23	P11127	DOI 10.1523/jneurosci.23-35-11127.2003
Lau LW	2012	ANN NEUROL	V72	P419	DOI 10.1002/ana.23599
Lee H	2010	P NATL ACAD SCI USA	V107	P3340	DOI 10.1073/pnas.0905437106
Lee JY	2016	NEUROBIOL DIS	V95	P66	DOI 10.1016/j.nbd.2016.07.015
Lee SH	2015	CYTOTHERAPY	V17	P1374	DOI 10.1016/j.jcyt.2015.05.012
Lemarchant S	2014	NEUROBIOL DIS	V66	P28	DOI 10.1016/j.nbd.2014.02.005
Lemke AK	2010	CELL TISSUE RES	V340	P179	DOI 10.1007/s00441-010-0941-4
LEMKE M	1987	BIOCHEM BIOPH RES CO	V147	P1170	DOI 10.1016/S0006-291X(87)80192-4
Lemons ML	1999	EXP NEUROL	V160	P51	DOI 10.1006/exnr.1999.7184
Levine J	2016	GLIA	V64	P668	DOI 10.1002/glia.22953
LEVINE JM	1987	J NEUROSCI	V7	P2721
Levine J	2016	BRAIN RES	V1638	P199	DOI 10.1016/j.brainres.2015.07.026
Li Y	1999	J NEUROCYTOL	V28	P417	DOI 10.1023/A:1007026001189
Li YQ	2017	NAT MED	V23	P733	DOI 10.1038/nm.4331
Liddelow SA	2017	NATURE	V541	P481	DOI 10.1038/nature21029
Lin CCJ	2017	NAT NEUROSCI	V20	P396	DOI 10.1038/nn.4493
Liu XZ	1997	J NEUROSCI	V17	P5395
Liu YY	2017	NEURON	V95	P817	DOI 10.1016/j.neuron.2017.07.037
Lonze BE	2002	NEURON	V35	P605	DOI 10.1016/S0896-6273(02)00828-0
Lu P	2004	J NEUROSCI	V24	P6402	DOI 10.1523/JNEUROSCI.1492-04.2004
Lu P	2008	EXP NEUROL	V209	P313	DOI 10.1016/j.expneurol.2007.08.004
Lu P	2007	EXP NEUROL	V203	P8	DOI 10.1016/j.expneurol.2006.07.030
Luchetti S	2010	J NEUROTRAUM	V27	P411	DOI 10.1089/neu.2009.0930
Lyons DA	2015	CSH PERSPECT BIOL	V7	DOI 10.1101/cshperspect.a020586
Lytle JM	2009	GLIA	V57	P270	DOI 10.1002/glia.20755
Ma MH	2004	J COMP NEUROL	V474	P469	DOI 10.1002/cne.20149
Maekawa M	1999	SCIENCE	V285	P895	DOI 10.1126/science.285.5429.895
Maolood N	2008	EUR J NEUROSCI	V27	P1143	DOI 10.1111/j.1460-9568.2008.06099.x
Marcon RM	2010	ACTA ORTOP BRAS	V18	P26	DOI 10.1590/S1413-78522010000100005
Massey JM	2008	EXP NEUROL	V209	P426	DOI 10.1016/j.expneurol.2007.03.029
Massey JM	2006	J NEUROSCI	V26	P4406	DOI 10.1523/JNEUROSCI.5467-05.2006
Mataga N	2004	NEURON	V44	P1031	DOI 10.1016/j.neuron.2004.11.028
Matthews RT	2002	J NEUROSCI	V22	P7536
Mauney SA	2013	BIOL PSYCHIAT	V74	P427	DOI 10.1016/j.biopsych.2013.05.007
Mautes AEM	2000	PHYS THER	V80	P673	DOI 10.1093/ptj/80.7.673
MCKEON RJ	1991	J NEUROSCI	V11	P3398
MCKEON RJ	1995	EXP NEUROL	V136	P32	DOI 10.1006/exnr.1995.1081
McLean J	2002	J NEUROSCI	V22	P5481
McTigue DM	2006	J NEUROPATH EXP NEUR	V65	P406	DOI 10.1097/01.jnen.0000218447.32320.52
McTigue DM	2001	J NEUROSCI	V21	P3392	DOI 10.1523/JNEUROSCI.21-10-03392.2001
Meletis K	2008	PLOS BIOL	V6	P1494	DOI 10.1371/journal.pbio.0060182
Menet V	2003	P NATL ACAD SCI USA	V100	P8999	DOI 10.1073/pnas.1533187100
Meyer-Franke A	1998	NEURON	V21	P681	DOI 10.1016/S0896-6273(00)80586-3
Mignardot JB	2017	SCI TRANSL MED	V9	DOI 10.1126/scitranslmed.aah3621
Mihai G	2008	J NEUROTRAUM	V25	P1	DOI 10.1089/neu.2007.0338
MILEV P	1994	J CELL BIOL	V127	P1703	DOI 10.1083/jcb.127.6.1703
Mironova YA	2013	TRENDS NEUROSCI	V36	P363	DOI 10.1016/j.tins.2013.04.003
Monnier PP	2003	MOL CELL NEUROSCI	V22	P319	DOI 10.1016/S1044-7431(02)00035-0
Monsul NT	2004	EXP NEUROL	V186	P124	DOI 10.1016/S0014-4886(03)00311-X
Moon LDF	2001	NAT NEUROSCI	V4	P465	DOI 10.1038/87415
Moransard M	2011	BRAIN	V134	P1315	DOI 10.1093/brain/awr070
Moreno-Manzano V	2009	STEM CELLS	V27	P733	DOI 10.1002/stem.24
MORGELIN M	1989	J BIOL CHEM	V264	P12080
Morris NP	2000	EUR J NEUROSCI	V12	P828	DOI 10.1046/j.1460-9568.2000.00970.x
Mueller CA	2006	J NEUROSURG-SPINE	V4	P233	DOI 10.3171/spi.2006.4.3.233
Muir EM	2010	J BIOTECHNOL	V145	P103	DOI 10.1016/j.jbiotec.2009.11.002
Muradov JM	2013	EXP NEUROL	V249	P59	DOI 10.1016/j.expneurol.2013.08.009
Muroyama Y	2005	NATURE	V438	P360	DOI 10.1038/nature04139
Nakanishi K	2006	J BIOL CHEM	V281	P24970	DOI 10.1074/jbc.M601498200
National Spinal Cord Injury Statistical Center	2017	FACTS FIG GLANC
Nazari-Robati M	2012	INT J BIOL MACROMOL	V50	P487	DOI 10.1016/j.ijbiomac.2012.01.009
Neirinckx V	2014	STEM CELLS	V32	P829	DOI 10.1002/stem.1579
Nigro J	2009	J BIOL CHEM	V284	P16832	DOI 10.1074/jbc.M109.002956
Nimmerjahn A	2005	SCIENCE	V308	P1314	DOI 10.1126/science.1110647
Nishiyama A	2002	J NEUROCYTOL	V31	P437	DOI 10.1023/A:1025783412651
Noble LJ	2002	J NEUROSCI	V22	P7526
NOBLE M	1984	J NEUROSCI	V4	P1892
Norden DM	2015	NEUROPHARMACOLOGY	V96	P29	DOI 10.1016/j.neuropharm.2014.10.028
Novak ML	2013	J LEUKOCYTE BIOL	V93	P875	DOI 10.1189/jlb.1012512
Oberheim NA	2009	J NEUROSCI	V29	P3276	DOI 10.1523/JNEUROSCI.4707-08.2009
Ohira K	2013	MOL BRAIN	V6	DOI 10.1186/1756-6606-6-43
Okada S	2006	NAT MED	V12	P829	DOI 10.1038/nm1425
Olmos G	2014	MEDIAT INFLAMM	V2014	DOI 10.1155/2014/861231
OOHIRA A	1991	J NEUROSCI	V11	P822
Oray S	2004	NEURON	V44	P1021	DOI 10.1016/j.neuron.2004.12.001
Orlando C	2015	BRAIN STRUCT FUNCT	V220	P1077	DOI 10.1007/s00429-013-0701-9
Orlando C	2012	J NEUROSCI	V32	P18009	DOI 10.1523/JNEUROSCI.2406-12.2012
Panenka W	2001	J NEUROSCI	V21	P7135	DOI 10.1523/JNEUROSCI.21-18-07135.2001
Pantazopoulos H	2015	TRANSL PSYCHIAT	V5	DOI 10.1038/tp.2014.128
Pantazopoulos H	2016	NEURAL PLAST	V2016	DOI 10.1155/2016/9847696
Pantazopoulos H	2010	ARCH GEN PSYCHIAT	V67	P155	DOI 10.1001/archgenpsychiatry.2009.196
Papatheodorou A	2017	J NEUROTRAUM	V34	P746	DOI 10.1089/neu.2016.4596
Park KK	2017	J COMP NEUROL	V525	P380	DOI 10.1002/cne.24070
Pasterkamp RJ	1999	MOL CELL NEUROSCI	V13	P143	DOI 10.1006/mcne.1999.0738
Paveliev M	2016	SCI REP-UK	V6	DOI 10.1038/srep33916
Pearson BL	2013	BEHAV BRAIN RES	V243	P138	DOI 10.1016/j.bbr.2012.12.062
Pedrazzi M	2007	J IMMUNOL	V179	P8525	DOI 10.4049/jimmunol.179.12.8525
Pendleton JC	2013	EXP NEUROL	V247	P113	DOI 10.1016/j.expneurol.2013.04.003
Pizzorusso T	2009	SCIENCE	V325	P1214	DOI 10.1126/science.1179697
Pluchino S	2005	BRAIN RES REV	V48	P211	DOI 10.1016/j.brainresrev.2004.12.011
Popovich PG	1997	J COMP NEUROL	V377	P443	DOI 10.1002/(SICI)1096-9861(19970120)377:3<443::AID-CNE10>3.0.CO;2-S
Popovich PG	1999	EXP NEUROL	V158	P351	DOI 10.1006/exnr.1999.7118
Popovich PG	2008	NAT REV NEUROSCI	V9	P481	DOI 10.1038/nrn2398
Prabhakar V	2005	BIOCHEM J	V390	P395	DOI 10.1042/BJ20050532
Qiu J	2002	PROG BRAIN RES	V137	P381
Qiu J	2002	NEURON	V34	P895	DOI 10.1016/S0896-6273(02)00730-4
Ramer LM	2004	J NEUROSCI	V24	P10796	DOI 10.1523/JNEUROSCI.3337-04.2004
Ranjan M	1996	MOL CELL NEUROSCI	V7	P404	DOI 10.1006/mcne.1996.0029
Ransohoff RM	2016	NAT NEUROSCI	V19	P987	DOI 10.1038/nn.4338
REBHUN J	1991	ANN ALLERGY	V66	P335
Regan MR	2007	J NEUROSCI	V27	P6607	DOI 10.1523/JNEUROSCI.0790-07.2007
Ren YL	2017	SCI REP-UK	V7	DOI 10.1038/srep41122
Rhodes KE	2006	NEUROSCIENCE	V140	P87	DOI 10.1016/j.neuroscience.2006.01.055
Rice T	2007	J NEUROPATH EXP NEUR	V66	P184	DOI 10.1097/01.jnen.0000248552.07338.7f
Robel S	2011	NAT REV NEUROSCI	V12	P88	DOI 10.1038/nrn2978
Rodriguez JP	2014	J NEUROSCI	V34	P10285	DOI 10.1523/JNEUROSCI.4915-13.2014
Rolls A	2008	PLOS MED	V5	P1262	DOI 10.1371/journal.pmed.0050171
Romberg C	2013	J NEUROSCI	V33	P7057	DOI 10.1523/JNEUROSCI.6267-11.2013
Rooney GE	2009	J NEUROSURG-SPINE	V11	P432	DOI 10.3171/2009.4.SPINE08784
RUDGE JS	1990	J NEUROSCI	V10	P3594
Ruschel J	2015	SCIENCE	V348	P347	DOI 10.1126/science.aaa2958
Rusnakova V	2013	PLOS ONE	V8	DOI 10.1371/journal.pone.0069734
Sahinkaya FR	2014	EXP NEUROL	V255	P113	DOI 10.1016/j.expneurol.2014.02.025
SANDLER AN	1976	J NEUROSURG	V45	P638	DOI 10.3171/jns.1976.45.6.0638
SANDLER AN	1976	J NEUROSURG	V45	P660	DOI 10.3171/jns.1976.45.6.0660
Sands WA	2008	CELL SIGNAL	V20	P460	DOI 10.1016/j.cellsig.2007.10.005
Schachtrup C	2010	J NEUROSCI	V30	P5843	DOI 10.1523/JNEUROSCI.0137-10.2010
Schmalfeldt M	2000	J CELL SCI	V113	P807
Schonberg DL	2009	EXP NEUROL	V218	P64	DOI 10.1016/j.expneurol.2009.04.005
Schroeder GD	2014	SPINE	V39	P971	DOI 10.1097/BRS.0000000000000297
SCHWARTZ NB	1977	J BIOL CHEM	V252	P6316
SCHWARTZ NB	1974	P NATL ACAD SCI USA	V71	P4047	DOI 10.1073/pnas.71.10.4047
Sekiya T	2015	P NATL ACAD SCI USA	V112	pE3431	DOI 10.1073/pnas.1501835112
Seo JH	2013	J CLIN INVEST	V123	P782	DOI 10.1172/JCI65863
Shechter R	2009	PLOS MED	V6	DOI 10.1371/journal.pmed.1000113
Shen YJ	2009	SCIENCE	V326	P592	DOI 10.1126/science.1178310
Shimizu F	2011	J CELL PHYSIOL	V226	P255	DOI 10.1002/jcp.22337
Shuman SL	1997	J NEUROSCI RES	V50	P798	DOI 10.1002/(SICI)1097-4547(19971201)50:5<798::AID-JNR16>3.3.CO;2-#
Siebert JR	2011	J NEUROCHEM	V119	P176	DOI 10.1111/j.1471-4159.2011.07370.x
Siebert JR	2011	EXP NEUROL	V231	P19	DOI 10.1016/j.expneurol.2011.05.002
Silver J	2004	NAT REV NEUROSCI	V5	P146	DOI 10.1038/nrn1326
Silver J	2016	EXP NEUROL	V286	P147	DOI 10.1016/j.expneurol.2016.06.018
Simon C	2011	GLIA	V59	P869	DOI 10.1002/glia.21156
Simonen M	2003	NEURON	V38	P201	DOI 10.1016/S0896-6273(03)00226-5
Slaker M	2015	J NEUROSCI	V35	P4190	DOI 10.1523/JNEUROSCI.3592-14.2015
SMITH GM	1988	PROG BRAIN RES	V78	P353
SMITHTHOMAS LC	1995	J CELL SCI	V108	P1307
SMITHTHOMAS LC	1994	J CELL SCI	V107	P1687
Snow DM	2001	MICROSC RES TECHNIQ	V54	P273	DOI 10.1002/jemt.1140
SNOW DM	1990	EXP NEUROL	V109	P111	DOI 10.1016/S0014-4886(05)80013-5
Snow DM	1996	INT J DEV NEUROSCI	V14	P331	DOI 10.1016/0736-5748(96)00017-2
Soderblom C	2013	J NEUROSCI	V33	P13882	DOI 10.1523/JNEUROSCI.2524-13.2013
Sofroniew MV	2015	CSH PERSPECT BIOL	V7	DOI 10.1101/cshperspect.a020420
Son YJ	2015	NEURAL REGEN RES	V10	P346	DOI 10.4103/1673-5374.153672
Springer JE	1999	NAT MED	V5	P943	DOI 10.1038/11387
Sroga JM	2003	J COMP NEUROL	V462	P223	DOI 10.1002/cne.10736
Stahlberg A	2011	NUCLEIC ACIDS RES	V39	DOI 10.1093/nar/gkq1182
STALLCUP WB	1987	J NEUROSCI	V7	P2737
Starkey ML	2012	EUR J NEUROSCI	V36	P3665	DOI 10.1111/ejn.12017
Steward O	2017	EXP NEUROL	V287	P374	DOI 10.1016/j.expneurol.2016.06.029
Stirling DP	2009	J NEUROSCI	V29	P753	DOI 10.1523/JNEUROSCI.4918-08.2009
Summers C	2010	TRENDS IMMUNOL	V31	P318	DOI 10.1016/j.it.2010.05.006
Summers L	2010	MOL CELL NEUROSCI	V44	P272	DOI 10.1016/j.mcn.2010.03.013
Sun D	2010	J NEUROSCI	V30	P14008	DOI 10.1523/JNEUROSCI.3605-10.2010
Sun F	2010	GLIA	V58	P1304	DOI 10.1002/glia.21009
Susarla BTS	2011	J NEUROCHEM	V119	P868	DOI 10.1111/j.1471-4159.2011.07470.x
Takeuchi K	2013	NAT COMMUN	V4	DOI 10.1038/ncomms3740
Talbott JF	2005	EXP NEUROL	V192	P11	DOI 10.1016/j.expneurol.2004.05.038
Tan AM	2006	J NEUROSCI	V26	P4729	DOI 10.1523/JNEUROSCI.3900-05.2006
Tan CL	2011	J NEUROSCI	V31	P6289	DOI 10.1523/JNEUROSCI.0008-11.2011
Tang XF	2003	J NEUROSCI RES	V71	P427	DOI 10.1002/jnr.10523
Taoka Y	1997	NEUROSCIENCE	V79	P1177	DOI 10.1016/S0306-4522(97)00011-0
TATOR CH	1991	J NEUROSURG	V75	P15	DOI 10.3171/jns.1991.75.1.0015
Tauchi R	2012	J NEUROINFLAMM	V9	DOI 10.1186/1742-2094-9-53
Tedeschi A	2016	NEURON	V92	P419	DOI 10.1016/j.neuron.2016.09.026
Teng YD	2002	P NATL ACAD SCI USA	V99	P3024	DOI 10.1073/pnas.052678899
Tester NJ	2007	J NEUROSCI RES	V85	P1110	DOI 10.1002/jnr.21199
Thompson KM	2003	MOL CELL NEUROSCI	V23	P681	DOI 10.1016/S1044-7431(03)00120-9
Tkalec AL	2000	APPL ENVIRON MICROB	V66	P29	DOI 10.1128/AEM.66.1.29-35.2000
Tom VJ	2013	EXP NEUROL	V239	P91	DOI 10.1016/j.expneurol.2012.09.011
Tom VJ	2009	J NEUROTRAUM	V26	P2323	DOI 10.1089/neu.2009.1047
Tom VJ	2009	J NEUROSCI	V29	P14881	DOI 10.1523/JNEUROSCI.3641-09.2009
Tom VJ	2004	J NEUROSCI	V24	P6531	DOI 10.1523/JNEUROSCI.0994-04.2004
Tomko P	2017	SPINAL CORD	V55	P255	DOI 10.1038/sc.2016.133
Totoiu MO	2005	J COMP NEUROL	V486	P373	DOI 10.1002/cne.20517
Treloar HB	2009	J NEUROSCI	V29	P9405	DOI 10.1523/JNEUROSCI.2356-09.2009
Trivedi A	2006	CLIN NEUROSCI RES	V6	P283	DOI 10.1016/j.cnr.2006.09.007
Tropea D	2003	J NEUROSCI	V23	P7034	DOI 10.1523/JNEUROSCI.23-18-07034.2003
Tsai HH	2012	SCIENCE	V337	P358	DOI 10.1126/science.1222381
Underly RG	2017	J NEUROSCI	V37	P129	DOI 10.1523/JNEUROSCI.2891-16.2016
Vavrek R	2007	J NEUROTRAUM	V24	P1667	DOI 10.1089/neu.2007.0290
Vogelaar CF	2015	PLOS ONE	V10	DOI 10.1371/journal.pone.0134371
Wang DF	2011	J NEUROSCI	V31	P9332	DOI 10.1523/JNEUROSCI.0983-11.2011
Wang H	2008	J CELL SCI	V121	P3083	DOI 10.1242/jcs.032649
Wang L	2009	EXP NEUROL	V216	P177	DOI 10.1016/j.expneurol.2008.11.017
Wang X	2015	GLIA	V63	P635	DOI 10.1002/glia.22774
Wang XX	2012	EXP NEUROL	V237	P55	DOI 10.1016/j.expneurol.2012.06.009
Wang Y	2007	EXP NEUROL	V203	P168	DOI 10.1016/j.expneurol.2006.08.006
Wanner IB	2008	GLIA	V56	P1691	DOI 10.1002/glia.20721
Wanner IB	2013	J NEUROSCI	V33	P12870	DOI 10.1523/JNEUROSCI.2121-13.2013
Warren PM	2014	2014 NEUR M PLANN
White RE	2008	RESTOR NEUROL NEUROS	V26	P197
Wilhelmsson U	2006	P NATL ACAD SCI USA	V103	P17513	DOI 10.1073/pnas.0602841103
Winkler EA	2011	NAT NEUROSCI	V14	P1398	DOI 10.1038/nn.2946
WOZNIEWICZ B	1983	PARAPLEGIA	V21	P312	DOI 10.1038/sc.1983.52
Wu D	2005	ACTA MED OKAYAMA	V59	P121
Wu JF	2014	J NEUROSCI	V34	P10989	DOI 10.1523/JNEUROSCI.5110-13.2014
Wu JF	2010	GLIA	V58	P410	DOI 10.1002/glia.20932
WUNDERLICH G	1994	GLIA	V10	P49	DOI 10.1002/glia.440100107
Xie YM	2001	J NEUROSCI	V21	P5130	DOI 10.1523/JNEUROSCI.21-14-05130.2001
Xie YM	2006	J BIOL CHEM	V281	P16482	DOI 10.1074/jbc.M603131200
Xu B	2015	NEUROBIOL DIS	V73	P36	DOI 10.1016/j.nbd.2014.08.030
Xu KX	1999	GLIA	V25	P390	DOI 10.1002/(SICI)1098-1136(19990215)25:4<390::AID-GLIA8>3.0.CO;2-7
Xu Y	2006	NEUROSCI LETT	V397	P174	DOI 10.1016/j.neulet.2005.12.051
Xu Z	2006	LIFE SCI	V79	P1895	DOI 10.1016/j.lfs.2006.06.023
Xue YX	2014	J NEUROSCI	V34	P6647	DOI 10.1523/JNEUROSCI.5390-13.2014
Yang C	2017	J NEURAL ENG	V14	DOI 10.1088/1741-2552/aa596b
Yang S	2015	EXP NEUROL	V265	P48	DOI 10.1016/j.expneurol.2014.11.013
Yang T	2005	EUR J NEUROSCI	V22	P2159	DOI 10.1111/j.1460-9568.2005.04403.x
Yang ZS	2006	J NEUROSCI	V26	P3829	DOI 10.1523/JNEUROSCI.4247-05.2006
Yawata I	2008	LIFE SCI	V82	P1111	DOI 10.1016/j.lfs.2008.03.010
Yeh TH	2009	GLIA	V57	P1239	DOI 10.1002/glia.20845
Yi JH	2014	EXP NEUROL	V255	P12	DOI 10.1016/j.expneurol.2014.02.007
Yick LW	2004	J NEUROTRAUM	V21	P932	DOI 10.1089/0897715041526221
Yoo M	2013	PLOS ONE	V8	DOI 10.1371/journal.pone.0057415
Zai LJ	2005	GLIA	V50	P247	DOI 10.1002/glia.20176
Zamanian JL	2012	J NEUROSCI	V32	P6391	DOI 10.1523/JNEUROSCI.6221-11.2012
Zawadzka M	2010	CELL STEM CELL	V6	P578	DOI 10.1016/j.stem.2010.04.002
Zhang HQ	2010	NEUROSCIENTIST	V16	P156	DOI 10.1177/1073858409355830
Zhang Y	2016	NEURON	V89	P37	DOI 10.1016/j.neuron.2015.11.013
Zhao RR	2011	J NEUROSCI METH	V201	P228	DOI 10.1016/j.jneumeth.2011.08.003
Zheng BH	2003	NEURON	V38	P213	DOI 10.1016/S0896-6273(03)00225-3
Zhou HX	2014	BRAIN RES	V1586	P46	DOI 10.1016/j.brainres.2014.08.048
Zhu XQ	2008	NEURON GLIA BIOL	V4	P19	DOI 10.1017/S1740925X09000015
Zhu Y	2015	NEUROBIOL DIS	V74	P114	DOI 10.1016/j.nbd.2014.10.024
Zhu YJ	2015	J NEUROTRAUM	V32	P1158	DOI 10.1089/neu.2014.3703
Ziskin JL	2007	NAT NEUROSCI	V10	P321	DOI 10.1038/nn1854
Zukor K	2013	J NEUROSCI	V33	P15350	DOI 10.1523/JNEUROSCI.2510-13.2013
Zuo J	1998	EXP NEUROL	V154	P654	DOI 10.1006/exnr.1998.6951
Zuo J	1998	J NEUROSCI	V18	P5203	DOI 10.1523/JNEUROSCI.18-14-05203.1998
Zuo J	1998	J NEUROBIOL	V34	P41	DOI 10.1002/(SICI)1097-4695(199801)34:1<41::AID-NEU4>3.3.CO;2-4
NR 451
TC 428
Z9 449
U1 15
U2 225
PU AMER PHYSIOLOGICAL SOC
PI Rockville
PA 6120 Executive Blvd	Suite 600	Rockville	MD	UNITED STATES
SN 0031-9333
EI 1522-1210
J9 PHYSIOL REV
JI Physiol. Rev.
PD APR
PY 2018
VL 98
IS 2
BP 881
EP 917
DI 10.1152/physrev.00017.2017
PG 37
WC Physiology
WE Science Citation Index Expanded (SCI-EXPANDED)
SC Physiology
GA GP6HR
UT WOS:000440979800006
PM 29513146
OA Green Published	Bronze
DA 2023-09-03
ER
PT J
AU Badhiwala	JH
Ahuja	CS
Akbar	MA
Witiw	CD
Nassiri	F
Furlan	JC
Curt	A
Wilson	JR
Fehlings	MG
AF Badhiwala	Jetan H.
Ahuja	Christopher S.
Akbar	Muhammad A.
Witiw	Christopher D.
Nassiri	Farshad
Furlan	Julio C.
Curt	Armin
Wilson	Jefferson R.
Fehlings	Michael G.
TI Degenerative cervical myelopathy - update and future directions
SO NATURE REVIEWS NEUROLOGY
LA English
DT Review
ID SPINAL-CORD-INJURY; POSTERIOR LONGITUDINAL LIGAMENT; QUALITY-OF-LIFE;
ORTHOPEDIC ASSOCIATION SCALE; CLINICALLY IMPORTANT DIFFERENCE;
RESONANCE-IMAGING FINDINGS; INCREASED SIGNAL INTENSITY; SODIUM-CHANNEL
BLOCKERS; FAS-MEDIATED APOPTOSIS; AOSPINE NORTH-AMERICA
AB Degenerative cervical myelopathy is the leading cause of spinal cord dysfunction in adults worldwide. In this Review	the authors provide a comprehensive pathophysiological and clinical overview of the condition to equip physicians across broad disciplines with the knowledge needed for its diagnosis and management.
Degenerative cervical myelopathy (DCM) is the leading cause of spinal cord dysfunction in adults worldwide. DCM encompasses various acquired (age-related) and congenital pathologies related to degeneration of the cervical spinal column	including hypertrophy and/or calcification of the ligaments	intervertebral discs and osseous tissues. These pathologies narrow the spinal canal	leading to chronic spinal cord compression and disability. Owing to the ageing population	rates of DCM are increasing. Expeditious diagnosis and treatment of DCM are needed to avoid permanent disability. Over the past 10 years	advances in basic science and in translational and clinical research have improved our understanding of the pathophysiology of DCM and helped delineate evidence-based practices for diagnosis and treatment. Surgical decompression is recommended for moderate and severe DCM; the best strategy for mild myelopathy remains unclear. Next-generation quantitative microstructural MRI and neurophysiological…	we provide a comprehensive	evidence-based review of DCM	including its definition	epidemiology	pathophysiology	clinical presentation	diagnosis and differential diagnosis	and non-operative and operative management. With this Review	we aim to equip physicians across broad disciplines with the knowledge necessary to make a timely diagnosis of DCM	recognize the clinical features that influence management and identify when urgent surgical intervention is warranted.
C1 [Badhiwala	Jetan H.; Ahuja	Christopher S.; Akbar	Muhammad A.; Nassiri	Farshad; Fehlings	Michael G.] Univ Toronto	Toronto Western Hosp	Dept Surg	Div Neurosurg	Toronto	ON	Canada.
[Witiw	Christopher D.; Wilson	Jefferson R.] Univ Toronto	St Michaels Hosp	Dept Surg	Div Neurosurg	Toronto	ON	Canada.
[Furlan	Julio C.] Univ Toronto	Lyndhurst Ctr	Toronto Rehabil Inst	Div Phys Med & Rehabil	Dept Med	Toronto	ON	Canada.
[Curt	Armin] Balgrist Univ Hosp	Spinal Cord Injury Ctr	Zurich	Switzerland.
C3 University of Toronto; University Health Network Toronto; University of
Toronto; Saint Michaels Hospital Toronto; University of Toronto;
University Health Network Toronto; Toronto Rehabilitation Institute;
University of Zurich
RP Fehlings	MG (corresponding author)	Univ Toronto	Toronto Western Hosp	Dept Surg	Div Neurosurg	Toronto	ON	Canada.
EM michael.fehlings@uhn.ca
RI Furlan	Julio/Q-8290-2018
OI Furlan	Julio/0000-0002-2038-0018; Fehlings	Michael
G./0000-0002-5722-6364
FU Gerry and Tootsie Halbert Chair in Neural Repair and Regeneration;
DeZwirek Family Foundation
FX M.G.F. acknowledges support from the Gerry and Tootsie Halbert Chair in
Neural Repair and Regeneration and the DeZwirek Family Foundation.
CR Aarabi B	2011	J NEUROSURG-SPINE	V14	P122	DOI 10.3171/2010.9.SPINE09922
Aarabi B	2013	NEUROSURGERY	V72	P195	DOI 10.1227/NEU.0b013e318276f64b
Ackery A	2006	J NEUROTRAUM	V23	P604	DOI 10.1089/neu.2006.23.604
Agrawal SK	1996	J NEUROSCI	V16	P545
Akter F	2018	NEUROSURG CLIN N AM	V29	P13	DOI 10.1016/j.nec.2017.09.015
Alexander S	2007	J NEUROTRAUM	V24	P790	DOI 10.1089/neu.2006.0133
[Anonymous]	2009	IN NAT PRIOR COMP EF	DOI DOI 10.17226/12648
[Anonymous]	2019	DATABANK POP EST PRO
Ates O	2007	J CLIN NEUROSCI	V14	P658	DOI 10.1016/j.jocn.2006.03.023
Badhiwala JH	2020	NEUROSURGERY	V86	P565	DOI 10.1093/neuros/nyz160
Badhiwala JH	2018	SPINE J	V18	P2220	DOI 10.1016/j.spinee.2018.05.009
Badhiwala JH	2019	NEUROSURGERY	V84	P890	DOI 10.1093/neuros/nyy133
Badhiwala JH	2018	NEUROSURG CLIN N AM	V29	P21	DOI 10.1016/j.nec.2017.09.002
Baptiste Darryl C	2006	Spine J	V6	p190S	DOI 10.1016/j.spinee.2006.04.024
Baron EM	2007	NEUROSURGERY	V60	P35	DOI 10.1227/01.NEU.0000215383.64386.82
BEAL MF	1992	ANN NEUROL	V31	P119	DOI 10.1002/ana.410310202
Beattie MS	2011	BRAIN	V134	P1259	DOI 10.1093/brain/awr088
Bednarik J	1998	Eur Spine J	V7	P493	DOI 10.1007/s005860050113
Bednarik J	1999	SPINE	V24	P1593	DOI 10.1097/00007632-199908010-00014
Bednarik J	2008	EUR SPINE J	V17	P421	DOI 10.1007/s00586-008-0585-1
Bednarik J	2011	J NEUROL NEUROSUR PS	V82	P779	DOI 10.1136/jnnp.2009.198945
BENZEL EC	1991	J SPINAL DISORD	V4	P286	DOI 10.1097/00002517-199109000-00005
BIERINGSORENSEN F	1990	PARAPLEGIA	V28	P105	DOI 10.1038/sc.1990.13
Bilney B	2003	GAIT POSTURE	V17	P68	DOI 10.1016/S0966-6362(02)00053-X
BISCHOFF C	1993	MUSCLE NERVE	V16	P154	DOI 10.1002/mus.880160206
BOHLMAN HH	1988	SPINE	V13	P843	DOI 10.1097/00007632-198807000-00025
Boogaarts HD	2015	EUR SPINE J	V24	pS139	DOI 10.1007/s00586-013-2781-x
BORDEN JN	1975	CLIN ORTHOP RELAT R	P162
BRAIN WR	1948	P ROY SOC MED	V41	P509
BREIG A	1966	J NEUROSURG	V25	P45	DOI 10.3171/jns.1966.25.1.0045
Buchan A C	1972	Paraplegia	V10	P23
Busch SA	2011	J NEUROSCI	V31	P944	DOI 10.1523/JNEUROSCI.3566-10.2011
CAMPBELL AMG	1960	BRIT MED J	V2	P481	DOI 10.1136/bmj.2.5197.481
Casha S	2005	EXP NEUROL	V196	P390	DOI 10.1016/j.expneurol.2005.08.020
Catz A	2004	SPINE	V29	P2278	DOI 10.1097/01.brs.0000142008.49907.c7
Chang F	2017	J CLIN LAB ANAL	V31	DOI 10.1002/jcla.22068
Chang HS	2014	SPINE	V39	P2136	DOI 10.1097/BRS.0000000000000607
Chapman GA	2000	J NEUROSCI	V20	DOI 10.1523/JNEUROSCI.20-15-j0004.2000
Chen GD	2016	SPINE	V41	P378	DOI 10.1097/BRS.0000000000001289
Chen LF	2016	NEUROSURG FOCUS	V40	DOI 10.3171/2016.3.FOCUS1663
Chibbaro S	2006	J CLIN NEUROSCI	V13	P233	DOI 10.1016/j.jocn.2005.04.011
Chiles BW	1999	NEUROSURGERY	V44	P762	DOI 10.1097/00006123-199904000-00041
CHOI DW	1992	J NEUROBIOL	V23	P1261	DOI 10.1002/neu.480230915
Chow CS	2005	J HAND SURG-ASIAN-PA	V10	P1	DOI 10.1142/S0218810405002425
Citterio A	2004	ARCH PHYS MED REHAB	V85	P1483	DOI 10.1016/j.apmr.2003.09.028
Clark AJ	2013	NEUROSURG FOCUS	V35	DOI 10.3171/2013.4.FOCUS13121
CLARKE E	1956	BRAIN	V79	P483	DOI 10.1093/brain/79.3.483
Curt A	1996	SPINAL CORD	V34	P326	DOI 10.1038/sc.1996.60
David S	2011	NAT REV NEUROSCI	V12	P388	DOI 10.1038/nrn3053
Davies BM	2019	GLOB SPINE J	V9	p65S	DOI 10.1177/2192568219832855
Davies BM	2018	BMJ-BRIT MED J	V360	DOI 10.1136/bmj.k186
Davies BM	2016	PLOS ONE	V11	DOI 10.1371/journal.pone.0157263
de Rota JJF	2007	J NEUROSURG-SPINE	V6	P17	DOI 10.3171/spi.2007.6.1.4
Demjen D	2004	NAT MED	V10	P389	DOI 10.1038/nm1007
Devlin Vincent J	2006	Spine J	V6	p212S	DOI 10.1016/j.spinee.2006.04.022
Dhillon RS	2016	ACTA NEUROPATHOL COM	V4	DOI 10.1186/s40478-016-0359-7
Dvorak J	2003	EUR SPINE J	V12	pS181	DOI 10.1007/s00586-003-0631-y
Fehlings MG	1998	SPINE	V23	P2730	DOI 10.1097/00007632-199812150-00012
Fehlings MG	2017	GLOB SPINE J	V7	p6S	DOI 10.1177/2192568217701714
Fehlings MG	2017	SPINE J	V17	P102	DOI 10.1016/j.spinee.2016.08.019
Fehlings MG	2015	SPINE	V40	P1322	DOI 10.1097/BRS.0000000000000988
Fehlings MG	2013	SPINE	V38	pS68	DOI 10.1097/BRS.0b013e3182a7e9b0
Fehlings MG	2013	J BONE JOINT SURG AM	V95A	P1651	DOI 10.2106/JBJS.L.00589
Ferguson SJ	2003	EUR SPINE J	V12	pS97	DOI 10.1007/s00586-003-0621-0
Figley SA	2014	J NEUROTRAUM	V31	P541	DOI 10.1089/neu.2013.3034
Flanagan EP	2014	ANN NEUROL	V76	P54	DOI 10.1002/ana.24184
FUKUI K	1990	SPINE	V15	P1148	DOI 10.1097/00007632-199011010-00012
Fumagalli S	2013	GLIA	V61	P827	DOI 10.1002/glia.22474
Furlan JC	2016	NEUROSURG FOCUS	V40	DOI 10.3171/2016.3.FOCUS1648
Furlan JC	2011	J NEUROSURG-SPINE	V14	P348	DOI 10.3171/2010.10.SPINE091029
Ghogawala Z	2018	NEUROSURG CLIN N AM	V29	P83	DOI 10.1016/j.nec.2017.09.005
Ghogawala Zoher	2015	Neurosurgery	V62 Suppl 1	P56	DOI 10.1227/NEU.0000000000000781
Ghogawala Z	2014	NEUROSURGERY	V75	P334	DOI 10.1227/NEU.0000000000000479
Goel A	2018	J CRANIOVERTEBRAL JU	V9	P1	DOI 10.4103/jcvjs.JCVJS_34_18
Gooding M R	1976	Surg Neurol	V5	P233
GOODING MR	1975	J NEUROSURG	V43	P9	DOI 10.3171/jns.1975.43.1.0009
GORE DR	1986	SPINE	V11	P521	DOI 10.1097/00007632-198607000-00003
Grabher P	2017	J NEUROTRAUM	V34	P2329	DOI 10.1089/neu.2017.4980
Grabher P	2016	SCI REP-UK	V6	DOI 10.1038/srep24636
Guo Q	2014	J ORTHOP SURG RES	V9	DOI 10.1186/s13018-014-0103-6
Guyatt GH	2008	BMJ-BRIT MED J	V336	P995	DOI 10.1136/bmj.39490.551019.BE
Guyatt GH	2008	BMJ-BRIT MED J	V336	P1049	DOI 10.1136/bmj.39493.646875.AE
Guyatt GH	2008	BRIT MED J	V336	P924	DOI 10.1136/bmj.39489.470347.AD
Hadley MN	2017	NEUROSURGERY	V81	P713	DOI 10.1093/neuros/nyx466
Haefeli JS	2013	J CLIN NEUROPHYSIOL	V30	P291	DOI 10.1097/WNP.0b013e31827ed9ee
HAIGNEY MCP	1992	CIRC RES	V71	P547	DOI 10.1161/01.RES.71.3.547
HAIGNEY MCP	1994	CIRCULATION	V90	P391	DOI 10.1161/01.CIR.90.1.391
Halvorsen CM	2011	ACTA NEUROL SCAND	V123	P358	DOI 10.1111/j.1600-0404.2010.01405.x
Harrison JK	1998	P NATL ACAD SCI USA	V95	P10896	DOI 10.1073/pnas.95.18.10896
Harrop JS	2010	SPINE	V35	P620	DOI 10.1097/BRS.0b013e3181b723af
Hausmann O	2003	SPINAL CORD	V41	P369	DOI 10.1038/sj.sc.3101483
Hilton B	2019	BMJ OPEN	V9	DOI 10.1136/bmjopen-2018-027000
Hilton B	2018	PLOS ONE	V13	DOI 10.1371/journal.pone.0207709
Hirai T	2013	PLOS ONE	V8	DOI 10.1371/journal.pone.0064528
Hoffman H	2015	J CLIN NEUROSCI	V22	P1444	DOI 10.1016/j.jocn.2015.04.002
Houlden H	2006	J NEUROL NEUROSUR PS	V77	P1106	DOI 10.1136/jnnp.2006.095513
HOUSER OW	1994	MAYO CLIN PROC	V69	P557	DOI 10.1016/S0025-6196(12)62248-4
Hughes J T	1965	Riv Patol Nerv Ment	V86	P196
HUMZAH MD	1988	ANAT RECORD	V220	P337	DOI 10.1002/ar.1092200402
Ide Makoto	1993	Journal of UOEH (University of Occupational and Environmental Health)	V15	P209
Inukai T	2009	SPINE	V34	P2848	DOI 10.1097/BRS.0b013e3181b0d078
IRVINE DH	1965	LANCET	V1	P1089
Ito T	1996	SPINE	V21	P827	DOI 10.1097/00007632-199604010-00010
Jones JGA	2013	AM J NEURORADIOL	V34	P471	DOI 10.3174/ajnr.A3199
Jutzeler CR	2017	J NEUROTRAUM	V34	P2045	DOI 10.1089/neu.2016.4891
Jutzeler CR	2016	SCI REP-UK	V6	DOI 10.1038/srep34660
Kadanka Z	2005	EUR J NEUROL	V12	P16	DOI 10.1111/j.1468-1331.2004.00947.x
Kadanka Z	2002	SPINE	V27	P2205	DOI 10.1097/00007632-200210150-00003
Kadanka Z	2000	EUR SPINE J	V9	P538	DOI 10.1007/s005860000132
Kadanka Z	2011	EUR SPINE J	V20	P1533	DOI 10.1007/s00586-011-1811-9
Kalsi-Ryan S	2013	SPINE	V38	pS111	DOI 10.1097/BRS.0b013e3182a7f499
Kalsi-Ryan S	2013	NEUROSCIENTIST	V19	P409	DOI 10.1177/1073858412467377
Kalsi-Ryan S	2012	J NEUROTRAUM	V29	P905	DOI 10.1089/neu.2010.1504
Kamiya M	2001	SPINE	V26	P1264	DOI 10.1097/00007632-200106010-00017
Karadimas SK	2010	CURR MED CHEM	V17	P1048
Karadimas SK	2015	SCI TRANSL MED	V7	DOI 10.1126/scitranslmed.aac6524
Karadimas SK	2015	EUR SPINE J	V24	pS132	DOI 10.1007/s00586-014-3264-4
Karadimas SK	2013	SPINE	V38	pS21	DOI 10.1097/BRS.0b013e3182a7f2c3
Karadimas SK	2013	NEUROBIOL DIS	V54	P43	DOI 10.1016/j.nbd.2013.02.013
Karadimas SK	2013	SPINE	V38	P4	DOI 10.1097/BRS.0b013e318261ea6f
Karpova A	2013	SPINE	V38	P392	DOI 10.1097/BRS.0b013e3182715bc3
Kiernan MC	2011	LANCET	V377	P942	DOI 10.1016/S0140-6736(10)61156-7
Kim DH	2011	CYTOKINE	V55	P343	DOI 10.1016/j.cyto.2011.05.016
Kim HJ	2008	J BONE JOINT SURG BR	V90B	P1468	DOI 10.1302/0301-620X.90B11.20632
Kim HJ	2013	SPINE	V38	pS78	DOI 10.1097/BRS.0b013e3182a7eb06
Kimura J.	2001	ELECTRODIAGNOSIS DIS
Klironomos G	2011	SPINAL CORD	V49	P1097	DOI 10.1038/sc.2011.71
Koga H	1998	AM J HUM GENET	V62	P1460	DOI 10.1086/301868
Kong LD	2013	EXP THER MED	V6	P852	DOI 10.3892/etm.2013.1224
Kong QQ	2007	SPINE	V32	P2834	DOI 10.1097/BRS.0b013e31815b761c
Kopjar B	2015	SPINE	V40	pE23	DOI 10.1097/BRS.0000000000000648
Koshizuka Y	2002	J BONE MINER RES	V17	P138	DOI 10.1359/jbmr.2002.17.1.138
Kramer JLK	2013	PAIN	V154	P235	DOI 10.1016/j.pain.2012.10.027
Kramer JLK	2012	J CLIN NEUROPHYSIOL	V29	P70	DOI 10.1097/WNP.0b013e318246ada2
Kusin DJ	2016	SPINE	V41	P1565	DOI 10.1097/BRS.0000000000001597
Kusin DJ	2016	SPINE	V41	P1436	DOI 10.1097/BRS.0000000000001560
Lacomblez L	1996	LANCET	V347	P1425	DOI 10.1016/S0140-6736(96)91680-3
Lad SP	2009	SURG NEUROL	V71	P66	DOI 10.1016/j.surneu.2008.02.045
Lang-Lazdunski L	1999	J THORAC CARDIOV SUR	V117	P881	DOI 10.1016/S0022-5223(99)70367-3
LAROCCA H	1988	SPINE	V13	P854	DOI 10.1097/00007632-198807000-00028
Laskin DL	2009	CHEM RES TOXICOL	V22	P1376	DOI 10.1021/tx900086v
Almeida GPL	2013	J BODYW MOV THER	V17	P504	DOI 10.1016/j.jbmt.2013.03.009
Lee CH	2015	J NEUROSURG-SPINE	V22	P589	DOI 10.3171/2014.10.SPINE1498
Lee J	2003	J NEUROSURG	V99	P8	DOI 10.3171/spi.2003.99.1.0008
LEES F	1963	BRIT MED J	P1607	DOI 10.1136/bmj.2.5373.1607
Lenehan B	2010	SPINE	V35	pS180	DOI 10.1097/BRS.0b013e3181f32a44
Letellier E	2010	IMMUNITY	V32	P240	DOI 10.1016/j.immuni.2010.01.011
Liu HW	2017	NEUROLOGY	V89	P602	DOI 10.1212/WNL.0000000000004197
Loy DN	2002	J COMP NEUROL	V445	P308	DOI 10.1002/cne.10168
Machino M	2014	J BONE JOINT SURG AM	V96A	P2049	DOI 10.2106/JBJS.N.00064
Maeda S	2001	J BONE MINER RES	V16	P948	DOI 10.1359/jbmr.2001.16.5.948
MAIGNE JY	1994	SPINE	V19	P189	DOI 10.1097/00007632-199401001-00013
MAIR WGP	1953	BRAIN	V76	P70	DOI 10.1093/brain/76.1.70
Mantovani A	2002	TRENDS IMMUNOL	V23	P549	DOI 10.1016/S1471-4906(02)02302-5
Manzano GR	2012	NEUROSURGERY	V70	P264	DOI 10.1227/NEU.0b013e3182305669
Martin AR	2017	AM J NEURORADIOL	V38	P1257	DOI 10.3174/ajnr.A5163
Martin AR	2017	AM J NEURORADIOL	V38	P1266	DOI 10.3174/ajnr.A5162
Martin AR	2018	BMJ OPEN	V8	DOI 10.1136/bmjopen-2017-019809
Martin AR	2018	PLOS ONE	V13	DOI 10.1371/journal.pone.0195733
Martin AR	2018	NEUROSURG CLIN N AM	V29	P33	DOI 10.1016/j.nec.2017.09.003
Martin AR	2016	NEUROIMAGE-CLIN	V10	P192	DOI 10.1016/j.nicl.2015.11.019
Mastronardi L	2007	J NEUROSURG-SPINE	V7	P615	DOI 10.3171/SPI-07/12/615
Matsumoto M	2001	SPINE	V26	P1592	DOI 10.1097/00007632-200107150-00021
Matsumoto M	2000	SPINE	V25	P677	DOI 10.1097/00007632-200003150-00005
Maysinger D	2008	J NEUROSCI	V28	P7891	DOI 10.1523/JNEUROSCI.1461-08.2008
McKinley WO	1999	ARCH PHYS MED REHAB	V80	P619	DOI 10.1016/S0003-9993(99)90162-4
Mestre T	2009	COCHRANE DB SYST REV	DOI 10.1002/14651858.CD006456.pub2
Miller RG	2012	COCHRANE DB SYST REV	DOI 10.1002/14651858.CD001447.pub3
Mochida K	1998	SPINE	V23	P990	DOI 10.1097/00007632-199805010-00005
Moon ES	2014	NEUROBIOL DIS	V62	P394	DOI 10.1016/j.nbd.2013.10.020
Mowforth Oliver Daniel	2019	JMIR Form Res	V3	pe11364	DOI 10.2196/11364
MURAKAMI N	1978	ARCH NEUROL-CHICAGO	V35	P33	DOI 10.1001/archneur.1978.00500250037008
NAGATA K	1990	SPINE	V15	P1088	DOI 10.1097/00007632-199011010-00002
Nakajima M	2016	AM J HUM GENET	V99	P202	DOI 10.1016/j.ajhg.2016.05.018
Nakamura I	1999	HUM GENET	V104	P492	DOI 10.1007/s004390050993
Nakamura K	1998	J SPINAL DISORD	V11	P175	DOI 10.3178/jjshwr.11.175
Nakamura M	2012	J NEUROSURG-SPINE	V17	P147	DOI 10.3171/2012.5.SPINE1196
Nakashima H	2012	EUR SPINE J	V21	P1389	DOI 10.1007/s00586-012-2241-z
New PW	2014	SPINAL CORD	V52	P97	DOI 10.1038/sc.2012.165
New PW	2005	ARCH PHYS MED REHAB	V86	P250	DOI 10.1016/j.apmr.2004.04.028
New PW	2002	ARCH PHYS MED REHAB	V83	P996	DOI 10.1053/apmr.2002.33100
NIXON J	1986	J ROY SOC MED	V79	P100	DOI 10.1177/014107688607900211
NOBLE LJ	1989	BRAIN RES	V482	P57	DOI 10.1016/0006-8993(89)90542-8
Noonan VK	2012	NEUROEPIDEMIOLOGY	V38	P219	DOI 10.1159/000336014
Nouri A	2017	SPINE	V42	P1851	DOI 10.1097/BRS.0000000000002234
Nouri A	2016	NEUROSURG FOCUS	V40	DOI 10.3171/2016.3.FOCUS1667
Nouri A	2015	SPINE	V40	pE675	DOI 10.1097/BRS.0000000000000913
Numasawa T	1999	J BONE MINER RES	V14	P500	DOI 10.1359/jbmr.1999.14.4.500
NURICK S	1972	BRAIN	V95	P101	DOI 10.1093/brain/95.1.101
NURICK S	1972	BRAIN	V95	P87
Oichi T	2015	SPINE	V40	P1941	DOI 10.1097/BRS.0000000000001153
OKADA Y	1993	SPINE	V18	P2024	DOI 10.1097/00007632-199310001-00016
Oshima Y	2012	SPINE	V37	P1909	DOI 10.1097/BRS.0b013e318259a65b
Ozawa H	2010	SPINAL CORD	V48	P415	DOI 10.1038/sc.2009.152
Palepu V	2012	ADV ORTHOP	V2012	DOI 10.1155/2012/726210
Papadopoulos CA	2004	ORTHOPEDICS	V27	P1087
Park YS	2006	NEUROL MED-CHIR	V46	P231	DOI 10.2176/nmc.46.231
Patel AA	2012	SPINE	V37	P26	DOI 10.1097/BRS.0b013e3182102ede
PAYNE EE	1957	BRAIN	V80	P571	DOI 10.1093/brain/80.4.571
Petersen JA	2017	NEUROREHAB NEURAL RE	V31	P432	DOI 10.1177/1545968316688796
Popovich PG	1997	J COMP NEUROL	V377	P443	DOI 10.1002/(SICI)1096-9861(19970120)377:3<443::AID-CNE10>3.0.CO;2-S
Popovich PG	2002	J NEUROPATH EXP NEUR	V61	P623	DOI 10.1093/jnen/61.7.623
Pouw MH	2011	SPINAL CORD	V49	P614	DOI 10.1038/sc.2010.171
Pouw MH	2010	SPINAL CORD	V48	P652	DOI 10.1038/sc.2009.155
Pumberger M	2013	BONE JOINT J	V95B	P966	DOI 10.1302/0301-620X.95B7.31363
REGAN RF	1991	NEUROSCIENCE	V43	P585	DOI 10.1016/0306-4522(91)90317-H
Ren Y	2012	PLOS ONE	V7	DOI 10.1371/journal.pone.0040587
Ren Y	2012	J ORTHOP RES	V30	P748	DOI 10.1002/jor.21586
Revanappa KK	2015	NEUROL INDIA	V63	P24	DOI 10.4103/0028-3886.152627
Rhee J	2017	GLOB SPINE J	V7	p35S	DOI 10.1177/2192568217703083
Rhee JM	2013	SPINE	V38	pS55	DOI 10.1097/BRS.0b013e3182a7f41d
Roberts S	2006	J BONE JOINT SURG AM	V88A	P10	DOI 10.2106/JBJS.F.00019
Ronen J	2004	ARCH PHYS MED REHAB	V85	P1499	DOI 10.1016/j.apmr.2003.11.015
Rowland LP	1998	J NEUROL SCI	V160	pS6	DOI 10.1016/S0022-510X(98)00193-2
Sampath P	2000	SPINE	V25	P670	DOI 10.1097/00007632-200003150-00004
SCHNEIDER RC	1954	J NEUROSURG	V11	P546	DOI 10.3171/jns.1954.11.6.0546
Schonherr MC	1996	SPINAL CORD	V34	P679	DOI 10.1038/sc.1996.123
Schultz DS	2009	J BIOMECH	V42	P1154	DOI 10.1016/j.jbiomech.2009.02.013
Schwartz G	2001	J NEUROSURG	V94	P245	DOI 10.3171/spi.2001.94.2.0245
Schwartz G	2002	PROG BRAIN RES	V137	P177
Schwartz M	2010	BRAIN BEHAV IMMUN	V24	P1054	DOI 10.1016/j.bbi.2010.01.010
Scivoletto G	2011	SPINAL CORD	V49	P391	DOI 10.1038/sc.2010.85
Setzer M	2008	SPINE	V33	P497	DOI 10.1097/BRS.0b013e3181657cf7
Setzer M	2009	J NEUROSURG-SPINE	V11	P659	DOI 10.3171/2009.7.SPINE08667
Shamji MF	2013	SPINE	V38	pS195	DOI 10.1097/BRS.0b013e3182a7eb27
Shea TB	2002	FREE RADICAL BIO MED	V33	P1115	DOI 10.1016/S0891-5849(02)01001-8
Shedid D	2007	NEUROSURGERY	V60	P7	DOI 10.1227/01.NEU.0000215430.86569.C4
Shimizu K	2005	SPINE	V30	P2388	DOI 10.1097/01.brs.0000184378.67465.5c
Shimomura T	2007	SPINE	V32	P2474	DOI 10.1097/BRS.0b013e3181573aee
SHINGU H	1989	PARAPLEGIA	V27	P182	DOI 10.1038/sc.1989.27
Singh A	2001	J Outcome Meas	V5	P798
Singh A	2014	CLIN EPIDEMIOL	V6	P309	DOI 10.2147/CLEP.S68889
Stapleton CJ	2011	NEUROSURG FOCUS	V30	DOI 10.3171/2010.12.FOCUS10271
Strek P	1998	EUR ARCH OTO-RHINO-L	V255	P437	DOI 10.1007/s004050050094
Suda K	2003	SPINE	V28	P1258	DOI 10.1097/00007632-200306150-00008
Sumi M	2012	J NEUROSURG-SPINE	V16	P8	DOI 10.3171/2011.8.SPINE11395
Sun QZ	2011	EUR SPINE J	V20	P1466	DOI 10.1007/s00586-011-1813-7
Suri Ashish	2003	Spine J	V3	P33	DOI 10.1016/S1529-9430(02)00448-5
Swagerty D L Jr	1994	Kans Med	V95	P226
Takeda M	2018	NEUROSURG CLIN N AM	V29	P159	DOI 10.1016/j.nec.2017.09.012
Takenouchi T	2008	SPINE	V33	P1943	DOI 10.1097/BRS.0b013e3181822ed7
Tanaka T	2003	AM J HUM GENET	V73	P812	DOI 10.1086/378593
TANIKAWA E	1986	Bulletin of Tokyo Medical and Dental University	V33	P117
TAYLOR AR	1953	LANCET	V264	P717
TERAYAMA K	1989	SPINE	V14	P1184	DOI 10.1097/00007632-198911000-00009
Tetreault L	2018	NEUROSURG CLIN N AM	V29	P115	DOI 10.1016/j.nec.2017.09.020
Tetreault L	2017	SPINE	V42	P372	DOI 10.1097/BRS.0000000000001777
Tetreault L	2017	EUR SPINE J	V26	P78	DOI 10.1007/s00586-016-4660-8
Tetreault L	2016	NEUROSURG FOCUS	V40	DOI 10.3171/2016.3.FOCUS1665
Tetreault L	2015	J BONE JOINT SURG AM	V97A	P2038	DOI 10.2106/JBJS.O.00189
Tetreault L	2015	SPINE	V40	P1653	DOI 10.1097/BRS.0000000000001127
Tetreault L	2015	NEUROSURGERY	V77	pS51	DOI 10.1227/NEU.0000000000000951
Tetreault LA	2017	GLOB SPINE J	V7	p42S	DOI 10.1177/2192568217700397
Tetreault LA	2017	GLOB SPINE J	V7	p28S	DOI 10.1177/2192568217700396
Tetreault LA	2017	GLOB SPINE J	V7	p8S	DOI 10.1177/2192568217701715
Tetreault LA	2015	SPINE J	V15	P388	DOI 10.1016/j.spinee.2014.12.145
Tetreault LA	2015	EUR SPINE J	V24	pS236	DOI 10.1007/s00586-013-2658-z
Tetreault LA	2013	SPINE	V38	pS89	DOI 10.1097/BRS.0b013e3182a7eae0
Tetreault LA	2013	J BONE JOINT SURG AM	V95A	P1659	DOI 10.2106/JBJS.L.01323
Tracy JA	2010	NEUROLOGIST	V16	P176	DOI 10.1097/NRL.0b013e3181da3a29
Tsiptsios I	2001	Electromyogr Clin Neurophysiol	V41	P305
Uchida K	2014	SPINE J	V14	P1601	DOI 10.1016/j.spinee.2013.09.038
van Middendorp JJ	2010	SPINAL CORD	V48	P657	DOI 10.1038/sc.2010.72
Vavasour IM	2014	SPINE J	V14	P2344	DOI 10.1016/j.spinee.2014.01.036
Vedantam A	2011	J NEUROSURG-SPINE	V15	P660	DOI 10.3171/2011.8.SPINE11452
Verghese PB	2011	LANCET NEUROL	V10	P241	DOI 10.1016/S1474-4422(10)70325-2
Vidal PM	2017	JCI INSIGHT	V2	DOI 10.1172/jci.insight.92512
Wada E	1999	SPINE	V24	P455	DOI 10.1097/00007632-199903010-00009
Wadman RI	2011	COCHRANE DB SYST REV	DOI 10.1002/14651858.CD006281.pub3
Wang DW	2013	CELL PHYSIOL BIOCHEM	V32	P210	DOI 10.1159/000350137
WANG H	2018	INT J MOL SCI	V19	DOI DOI 10.1186/s12891-018-1966-1
Wang H	2008	EUR SPINE J	V17	P956	DOI 10.1007/s00586-008-0651-8
Wang LF	2010	J NEUROSURG-SPINE	V13	P319	DOI 10.3171/2010.3.SPINE09887
Wang ZC	2012	GENET MOL RES	V11	P1238	DOI 10.4238/2012.May.9.2
Wang ZC	2010	CLIN CHIM ACTA	V411	P794	DOI 10.1016/j.cca.2010.01.031
Wen CY	2014	RADIOLOGY	V270	P197	DOI 10.1148/radiol.13121885
Whetstone WD	2003	J NEUROSCI RES	V74	P227	DOI 10.1002/jnr.10759
WHITE AA	1988	SPINE	V13	P856	DOI 10.1097/00007632-198807000-00029
Wilson JR	2017	NEUROSURGERY	V80	pS33	DOI 10.1093/neuros/nyw083
Wilson JR	2017	SPINE	V42	P195	DOI 10.1097/BRS.0000000000001859
Wilson JR	2013	SPINE	V38	pS37	DOI 10.1097/BRS.0b013e3182a7f2e7
Wilson JR	2013	SPINE	V38	pS123	DOI 10.1097/BRS.0b013e3182a7f478
Witiw CD	2017	SPINE J	V17	P15	DOI 10.1016/j.spinee.2016.10.015
Wolf K	2018	SPINAL CORD	V56	P769	DOI 10.1038/s41393-018-0075-1
World Health Organization	2018	AG HLTH
Wu JC	2013	NEUROSURG FOCUS	V35	DOI 10.3171/2013.4.FOCUS13122
Wu JC	2012	J NEUROTRAUM	V29	P462	DOI 10.1089/neu.2011.2095
Wu JB	2014	CELL PHYSIOL BIOCHEM	V34	P565	DOI 10.1159/000363023
Wu Y	2014	NEUROSCIENCE	V265	P302	DOI 10.1016/j.neuroscience.2014.01.059
Wu YC	2013	J NEUROTRAUM	V30	P441	DOI 10.1089/neu.2012.2622
Wu Yongchao	2010	Evid Based Spine Care J	V1	P71	DOI 10.1055/s-0030-1267047
Yagi M	2010	J NEUROSURG-SPINE	V12	P59	DOI 10.3171/2009.5.SPINE08940
Yonenobu K	2001	SPINE	V26	P1890	DOI 10.1097/00007632-200109010-00014
Yoo WK	2013	SPINE J	V13	P867	DOI 10.1016/j.spinee.2013.02.005
Yoon ST	2013	SPINE	V38	pS183	DOI 10.1097/BRS.0b013e3182a7eb7c
Yoshimatsu H	2001	Spine J	V1	P269	DOI 10.1016/S1529-9430(01)00082-1
Young WF	2000	AM FAM PHYSICIAN	V62	P1064
Yu W. R.	2012	ANN SFN M
Yu WR	2011	BRAIN	V134	P1277	DOI 10.1093/brain/awr054
Yu WR	2009	NEUROBIOL DIS	V33	P149	DOI 10.1016/j.nbd.2008.09.024
Yukawa Y	2007	SPINE	V32	P1675	DOI 10.1097/BRS.0b013e318074d62e
Zhan AD	2018	JAMA NEUROL	V75	P876	DOI 10.1001/jamaneurol.2018.0809
Zhang L	2011	SPINE	V36	pE1134	DOI 10.1097/BRS.0b013e3181f822c7
Zhang YZ	2010	SPINE	V35	pE396	DOI 10.1097/BRS.0b013e3181c6dbc4
Zhou FF	2015	EUR SPINE J	V24	P2918	DOI 10.1007/s00586-015-4208-3
Zong YQ	2014	NEUROL SCI	V35	P1373	DOI 10.1007/s10072-014-1714-8
NR 306
TC 154
Z9 157
U1 13
U2 53
PU NATURE PUBLISHING GROUP
PI NEW YORK
PA 75 VARICK ST	9TH FLR	NEW YORK	NY 10013-1917 USA
SN 1759-4758
EI 1759-4766
J9 NAT REV NEUROL
JI Nat. Rev. Neurol.
PD FEB
PY 2020
VL 16
IS 2
BP 108
EP 124
DI 10.1038/s41582-019-0303-0
EA JAN 2020
PG 17
WC Clinical Neurology
WE Science Citation Index Expanded (SCI-EXPANDED)
SC Neurosciences & Neurology
GA KH6AS
UT WOS:000509036500001
PM 31974455
DA 2023-09-03
ER
PT J
AU Bramlett	HM
Dietrich	WD
AF Bramlett	Helen M.
Dietrich	W. Dalton
TI Long-Term Consequences of Traumatic Brain Injury: Current Status of
Potential Mechanisms of Injury and Neurological Outcomes
SO JOURNAL OF NEUROTRAUMA
LA English
DT Article
DE atrophy; inflammation; neurogenesis; progressive damage; TBI; white
matter
ID SPINAL-CORD-INJURY; CONTROLLED CORTICAL IMPACT; CEREBRAL-BLOOD-FLOW;
AMYLOID PRECURSOR PROTEIN; FLUID-PERCUSSION INJURY;
CENTRAL-NERVOUS-SYSTEM; CALPAIN-MEDIATED PROTEOLYSIS; EXCITATORY
AMINO-ACIDS; CLOSED-HEAD-INJURY; IN-VIVO MODEL
AB Traumatic brain injury (TBI) is a significant clinical problem with few therapeutic interventions successfully translated to the clinic. Increased importance on the progressive	long-term consequences of TBI have been emphasized	both in the experimental and clinical literature. Thus	there is a need for a better understanding of the chronic consequences of TBI	with the ultimate goal of developing novel therapeutic interventions to treat the devastating consequences of brain injury. In models of mild	moderate	and severe TBI	histopathological and behavioral studies have emphasized the progressive nature of the initial traumatic insult and the involvement of multiple pathophysiological mechanisms	including sustained injury cascades leading to prolonged motor and cognitive deficits. Recently	the increased incidence in age-dependent neurodegenerative diseases in this patient population has also been emphasized. Pathomechanisms felt to be active in the acute and long-term consequences of TBI include excitotoxicity	apoptosis	inflammatory events	seizures	demyelination	white matter pathology	as well as decreased neurogenesis. The current article will review many of these pathophysiological mechanisms that may be important targets for limiting the chronic consequences of TBI.
C1 [Bramlett	Helen M.; Dietrich	W. Dalton] Univ Miami	Miller Sch Med	Dept Neurol Surg	Miami Project Cure Paralysis	Miami	FL 33136 USA.
C3 University of Miami
RP Bramlett	HM (corresponding author)	Univ Miami	Miller Sch Med	Dept Neurol Surg	1095 Northwest 14th Terrace	Miami	FL 33136 USA.
EM HBramlett@med.miami.edu
FU National Institutes of Health [NS030291]; Veterans Affairs [1 I01
BX000521]
FX This work was funded by the National Institutes of Health (NS030291) and
Veterans Affairs (1 I01 BX000521). The authors thank Jeremy Lytle for
editorial support.
CR Abdel-Dayem HM	1998	CLIN NUCL MED	V23	P309	DOI 10.1097/00003072-199805000-00009
Acosta SA	2013	PLOS ONE	V8	DOI 10.1371/journal.pone.0053376
Adamczak S	2012	J NEUROSURG	V117	P1119	DOI 10.3171/2012.9.JNS12815
Adamczak SE	2014	J CEREBR BLOOD F MET	V34	P621	DOI 10.1038/jcbfm.2013.236
Adams JH	2000	BRAIN	V123	P1327	DOI 10.1093/brain/123.7.1327
Adnan A	2013	BRAIN INJURY	V27	P1415	DOI 10.3109/02699052.2013.823659
Alessandri B	2012	Acta Neurochir Suppl	V114	P373	DOI 10.1007/978-3-7091-0956-4_72
Algattas H	2014	INT J MOL SCI	V15	P309	DOI 10.3390/ijms15010309
ANDERSON CV	1995	J NEUROPSYCH CLIN N	V7	P42
Annegers JF	1998	NEW ENGL J MED	V338	P20	DOI 10.1056/NEJM199801013380104
[Anonymous]	2014	J ANAESTHESIOL CLIN
Arndt DH	2013	EPILEPSIA	V54	P1780	DOI 10.1111/epi.12369
Asikainen I	1999	EPILEPSIA	V40	P584	DOI 10.1111/j.1528-1157.1999.tb05560.x
Atkins CM	2010	EUR J NEUROSCI	V32	P1912	DOI 10.1111/j.1460-9568.2010.07467.x
Avramescu S	2009	J NEUROTRAUM	V26	P799	DOI 10.1089/neu.2008.0739
BABB TL	1991	NEUROSCIENCE	V42	P351	DOI 10.1016/0306-4522(91)90380-7
Bailey DM	2013	CLIN SCI	V124	P177	DOI 10.1042/CS20120259
Bains M	2012	BBA-MOL BASIS DIS	V1822	P675	DOI 10.1016/j.bbadis.2011.10.017
Bao YH	2011	J NEUROTRAUM	V28	P35	DOI 10.1089/neu.2010.1383
Baranova AI	2008	J NEUROSURG	V109	P502	DOI 10.3171/JNS/2008/109/9/0502
Barha CK	2011	EXP NEUROL	V231	P72	DOI 10.1016/j.expneurol.2011.05.016
Bartnik BL	2007	J NEUROTRAUM	V24	P181	DOI 10.1089/neu.2006.0038
Baugh CM	2012	BRAIN IMAGING BEHAV	V6	P244	DOI 10.1007/s11682-012-9164-5
Belur PK	2013	NEUROSURG FOCUS	V34	DOI 10.3171/2013.2.FOCUS1317
Bergeson AG	2004	CLIN NEUROPSYCHOL	V18	P509	DOI 10.1080/1385404049052414
Bigler ED	2011	NEUROREHABILITATION	V28	P63	DOI 10.3233/NRE-2011-0633
Blaiss CA	2011	J NEUROSCI	V31	P4906	DOI 10.1523/JNEUROSCI.5265-10.2011
Blaya MO	2014	J NEUROTRAUM	V31	P476	DOI [10.1089/neu.2013.3135	10.1089/NEU.2013.3135]
BLUMBERGS PC	1994	LANCET	V344	P1055	DOI 10.1016/S0140-6736(94)91712-4
BOUMA GJ	1991	J NEUROSURG	V75	P685	DOI 10.3171/jns.1991.75.5.0685
Bramlett HM	2007	PROG BRAIN RES	V161	P125	DOI 10.1016/S0079-6123(06)61009-1
Bramlett HM	2004	J CEREBR BLOOD F MET	V24	P133	DOI 10.1097/01.WCB.0000111614.19196.04
Bramlett HM	2003	EXP NEUROL	V184	P27	DOI 10.1016/S0014-4886(03)00401-1
Bramlett HM	1997	J NEUROPATH EXP NEUR	V56	P1132	DOI 10.1097/00005072-199710000-00007
Bramlett HM	1997	ACTA NEUROPATHOL	V93	P190	DOI 10.1007/s004010050602
Bramlett HM	2002	ACTA NEUROPATHOL	V103	P607	DOI 10.1007/s00401-001-0510-8
Bregy A	2012	EXP NEUROL	V233	P821	DOI 10.1016/j.expneurol.2011.12.008
Brophy GM	2009	J NEUROTRAUM	V26	P471	DOI 10.1089/neu.2008.0657
BRYAN RM	1995	ANESTH ANALG	V80	P687	DOI 10.1097/00000539-199504000-00007
Buki A	1999	EXP NEUROL	V159	P319	DOI 10.1006/exnr.1999.7139
Bullock R	1995	ANN NY ACAD SCI	V765	P290	DOI 10.1111/j.1749-6632.1995.tb16586.x
Bullock R	1992	Acta Neurochir Suppl (Wien)	V55	P49
Bushnik T	2012	J HEAD TRAUMA REHAB	V27	pE36	DOI 10.1097/HTR.0b013e318273375c
Castillo-Carranza Diana L	2013	Front Biosci (Schol Ed)	V5	P426
Chatzipanteli K	2000	J NEUROTRAUM	V17	P321	DOI 10.1089/neu.2000.17.321
Chatzipanteli K	2000	J CEREBR BLOOD F MET	V20	P531	DOI 10.1097/00004647-200003000-00012
Chen XH	2003	J NEUROTRAUM	V20	P623	DOI 10.1089/089771503322144545
Chhor V	2013	BRAIN BEHAV IMMUN	V32	P70	DOI 10.1016/j.bbi.2013.02.005
Chirumamilla S	2002	J NEUROTRAUM	V19	P693	DOI 10.1089/08977150260139084
Clark RSB	2000	J NEUROCHEM	V74	P740	DOI 10.1046/j.1471-4159.2000.740740.x
Clausen F	2011	EUR J NEUROSCI	V34	P110	DOI 10.1111/j.1460-9568.2011.07723.x
Clausen F	2009	EUR J NEUROSCI	V30	P385	DOI 10.1111/j.1460-9568.2009.06820.x
Clond MA	2013	PLOS ONE	V8	DOI 10.1371/journal.pone.0061819
Conti AC	1998	J NEUROSCI	V18	P5663
Cornelius C	2013	ANTIOXID REDOX SIGN	V19	P836	DOI 10.1089/ars.2012.4981
Corrigan JD	2013	ARCH PHYS MED REHAB	V94	P1199	DOI 10.1016/j.apmr.2013.01.023
CULLUM CM	1986	J CLIN EXP NEUROPSYC	V8	P437	DOI 10.1080/01688638608401333
Czeiter E	2009	MOLECULES	V14	P5115	DOI 10.3390/molecules14125115
Daneshvar DH	2011	PHYS MED REH CLIN N	V22	P683	DOI 10.1016/j.pmr.2011.08.009
Danton GH	2002	J CEREBR BLOOD F MET	V22	P612	DOI 10.1097/00004647-200205000-00013
Das M	2012	J NEUROINFLAMM	V9	DOI 10.1186/1742-2094-9-236
Dash PK	2001	J NEUROSCI RES	V63	P313	DOI 10.1002/1097-4547(20010215)63:4<313::AID-JNR1025>3.3.CO;2-W
Dashnaw ML	2012	NEUROSURG FOCUS	V33	DOI 10.3171/2012.10.FOCUS12284
DeKosky ST	2013	NAT REV NEUROL	V9	P192	DOI 10.1038/nrneurol.2013.36
Deng W	2010	NAT REV NEUROSCI	V11	P339	DOI 10.1038/nrn2822
DEWITT DS	1986	J NEUROSURG	V64	P787	DOI 10.3171/jns.1986.64.5.0787
Di Pietro V	2014	FREE RADICAL BIO MED	V69	P258	DOI 10.1016/j.freeradbiomed.2014.01.032
Dickson TC	2007	NEUROREPORT	V18	P283	DOI 10.1097/WNR.0b013e3280143cdb
Dietrich WD	2009	J NEUROTRAUM	V26	P301	DOI 10.1089/neu.2008.0806
Dietrich WD	1996	J CEREBR BLOOD F MET	V16	P481	DOI 10.1097/00004647-199605000-00015
DIETRICH WD	1992	J NEUROTRAUM	V9	pS475
Dietrich WD	1998	NEUROSURGERY	V43	P585	DOI 10.1097/00006123-199809000-00105
Dixon CE	1999	J NEUROTRAUM	V16	P109	DOI 10.1089/neu.1999.16.109
Dohmen C	2008	ANN NEUROL	V63	P720	DOI 10.1002/ana.21390
Donnelly DJ	2009	J NEUROSCI METH	V181	P36	DOI 10.1016/j.jneumeth.2009.04.010
Dreier JP	2012	BRAIN	V135	P259	DOI 10.1093/brain/awr303
Dreier JP	2011	NAT MED	V17	P439	DOI 10.1038/nm.2333
Dupret D	2008	PLOS ONE	V3	DOI 10.1371/journal.pone.0001959
Eldadah BA	2000	J NEUROTRAUM	V17	P811	DOI 10.1089/neu.2000.17.811
FADEN AI	1989	SCIENCE	V244	P798	DOI 10.1126/science.2567056
Fenn AM	2014	BIOL PSYCHIAT	V76	P575	DOI 10.1016/j.biopsych.2013.10.014
Fields RD	2008	TRENDS NEUROSCI	V31	P361	DOI 10.1016/j.tins.2008.04.001
Flygt J	2013	EUR J NEUROSCI	V38	P2153	DOI 10.1111/ejn.12179
Forbes ML	1997	J CEREBR BLOOD F MET	V17	P865	DOI 10.1097/00004647-199708000-00005
Frugier T	2010	J NEUROTRAUM	V27	P497	DOI 10.1089/neu.2009.1120
Fujita M	2011	J NEUROTRAUM	V28	P1209	DOI 10.1089/neu.2011.1852
Gao X	2008	J NEUROSCI RES	V86	P2258	DOI 10.1002/jnr.21677
Gao X	2009	EXP NEUROL	V219	P516	DOI 10.1016/j.expneurol.2009.07.007
Garga Nina	2006	Epilepsy Curr	V6	P1	DOI 10.1111/j.1535-7511.2005.00083.x
Gaulke LJ	2005	MOL BRAIN RES	V141	P138	DOI 10.1016/j.molbrainres.2005.08.011
Gensel JC	2012	CELL TISSUE RES	V349	P201	DOI 10.1007/s00441-012-1425-5
Gentleman SM	2004	FORENSIC SCI INT	V146	P97	DOI 10.1016/j.forsciint.2004.06.027
Ginsberg MD	1997	AM J PHYSIOL-HEART C	V272	pH2859	DOI 10.1152/ajpheart.1997.272.6.H2859
GLOBUS MYT	1995	J NEUROCHEM	V65	P1704
Golarai G	2001	J NEUROSCI	V21	P8523	DOI 10.1523/JNEUROSCI.21-21-08523.2001
GOLDENBERG G	1992	J NEUROL NEUROSUR PS	V55	P362	DOI 10.1136/jnnp.55.5.362
Goldman SM	2006	ANN NEUROL	V60	P65	DOI 10.1002/ana.20882
Gould E	1999	NAT NEUROSCI	V2	P260	DOI 10.1038/6365
GRAHAM DI	1995	NEUROPATH APPL NEURO	V21	P27	DOI 10.1111/j.1365-2990.1995.tb01025.x
GRAHAM DI	1995	BRAIN PATHOL	V5	P397	DOI 10.1111/j.1750-3639.1995.tb00618.x
GRAY BG	1992	J NUCL MED	V33	P52
Greenberg G	2008	ARCH PHYS MED REHAB	V89	pS45	DOI 10.1016/j.apmr.2008.08.211
Greer JE	2011	J NEUROSCI	V31	P5089	DOI 10.1523/JNEUROSCI.5103-10.2011
Grossman SD	1999	J NEUROSCI	V19	P5711	DOI 10.1523/JNEUROSCI.19-14-05711.1999
Hall ED	2005	J NEUROTRAUM	V22	P252	DOI 10.1089/neu.2005.22.252
Hall ED	2008	J NEUROTRAUM	V25	P235	DOI 10.1089/neu.2007.0383
Hall ED	2012	EXP NEUROL	V238	P176	DOI 10.1016/j.expneurol.2012.08.024
Hamberger A	2003	J NEUROTRAUM	V20	P169	DOI 10.1089/08977150360547080
HAMM RJ	1993	COGNITIVE BRAIN RES	V1	P223	DOI 10.1016/0926-6410(93)90006-Q
Hartings JA	2009	J NEUROTRAUM	V26	P1857	DOI [10.1089/neu.2009.0961	10.1089/neu.2009-0961]
Hayasaki K	1997	ACT NEUR S	V70	P75
HAYES RL	1992	J NEUROTRAUM	V9	pS173
Hayward NMEA	2010	J NEUROTRAUM	V27	P2203	DOI 10.1089/neu.2010.1448
Hayward NMEA	2011	J CEREBR BLOOD F MET	V31	P166	DOI 10.1038/jcbfm.2010.67
Hemerka JN	2012	J NEUROTRAUM	V29	P2192	DOI 10.1089/neu.2011.2303
Hertle DN	2012	BRAIN	V135	P2390	DOI 10.1093/brain/aws152
Honda Mitsuru	2013	Acta Neurochir Suppl	V118	P259	DOI 10.1007/978-3-7091-1434-6_49
Hu XM	2012	STROKE	V43	P3063	DOI 10.1161/STROKEAHA.112.659656
Hughes RH	2014	BRAIN RES	V1543	P308	DOI 10.1016/j.brainres.2013.11.020
Hutchinson PJ	2005	ACTA NEUROCHIR SUPPL	V95	P441
Institute of Medicine	2009	GULF WAR AND HLTH
Irving EA	1996	NEUROSCI LETT	V213	P189
Jacobs A	1996	J NUCL MED	V37	P1605
Jellinger K A	2001	BMC Neurol	V1	P3	DOI 10.1186/1471-2377-1-3
Jetten N	2014	ANGIOGENESIS	V17	P109	DOI 10.1007/s10456-013-9381-6
Johnson VE	2013	BRAIN	V136	P28	DOI 10.1093/brain/aws322
Johnson VE	2013	EXP NEUROL	V246	P35	DOI 10.1016/j.expneurol.2012.01.013
Jones NC	2005	EUR J NEUROSCI	V22	P72	DOI 10.1111/j.1460-9568.2005.04221.x
KATAYAMA Y	1990	J NEUROSURG	V73	P889	DOI 10.3171/jns.1990.73.6.0889
KATSURA K	1992	BRAIN RES	V590	P6	DOI 10.1016/0006-8993(92)91075-P
Keane RW	2001	J CEREBR BLOOD F MET	V21	P1189	DOI 10.1097/00004647-200110000-00007
Kharatishvili I	2006	NEUROSCIENCE	V140	P685	DOI 10.1016/j.neuroscience.2006.03.012
Kharatishvili I	2007	BRAIN	V130	P3155	DOI 10.1093/brain/awm268
Kigerl KA	2009	J NEUROSCI	V29	P13435	DOI 10.1523/JNEUROSCI.3257-09.2009
Kim J	2012	NEUROREHAB NEURAL RE	V26	P870	DOI 10.1177/1545968311434553
Kinoshita K	2002	NEUROSURGERY	V51	P195	DOI 10.1097/00006123-200207000-00027
Knoblach SM	2002	J NEUROTRAUM	V19	P1155	DOI 10.1089/08977150260337967
Kochanek PM	2011	J TRAUMA	V71	pS15	DOI 10.1097/TA.0b013e31822117fe
Kochanek PM	2002	J NEUROTRAUM	V19	P1029	DOI 10.1089/089771502760341947
KONTOS HA	1981	FED PROC	V40	P2326
Kumar R	2009	J NEUROTRAUM	V26	P481	DOI 10.1089/neu.2008.0461
Lemmon VP	2014	J NEUROTRAUM	V31	P1354	DOI 10.1089/neu.2014.3400
Len TK	2011	CLIN PHYSIOL FUNCT I	V31	P85	DOI 10.1111/j.1475-097X.2010.00990.x
Len TK	2013	BRAIN INJURY	V27	P346	DOI 10.3109/02699052.2012.743185
LEVIN HS	1987	J NEUROSURG	V66	P706	DOI 10.3171/jns.1987.66.5.0706
LEWEN A	1995	NEUROREPORT	V6	P357	DOI 10.1097/00001756-199501000-00032
Liu MC	2006	BIOCHEM J	V394	P715	DOI 10.1042/BJ20050905
Liu W	2013	NMR BIOMED	V26	P651	DOI 10.1002/nbm.2910
Loane DJ	2014	J NEUROPATH EXP NEUR	V73	P14	DOI 10.1097/NEN.0000000000000021
Loane DJ	2010	TRENDS PHARMACOL SCI	V31	P596	DOI 10.1016/j.tips.2010.09.005
Lotocki G	2011	NEUROSCI LETT	V499	P143	DOI 10.1016/j.neulet.2011.05.056
Lowenstein DH	2009	EPILEPSIA	V50	P4	DOI 10.1111/j.1528-1167.2008.02004.x
Lu J	2012	BRAIN INJURY	V26	P1523	DOI 10.3109/02699052.2012.722257
Lu XCM	2013	J NEUROTRAUM	V30	P580	DOI 10.1089/neu.2012.2641
Lucas SM	2006	BRIT J PHARMACOL	V147	pS232	DOI 10.1038/sj.bjp.0706400
Lye TC	2000	NEUROPSYCHOL REV	V10	P115	DOI 10.1023/A:1009068804787
Ma M	2012	J NEUROTRAUM	V29	P2555	DOI 10.1089/neu.2012.2473
Ma MR	2012	J NEUROTRAUM	V29	P445	DOI 10.1089/neu.2011.2060
Ma M	2009	EXP NEUROL	V215	P119	DOI 10.1016/j.expneurol.2008.09.024
MARION DW	1991	J NEUROSURG	V74	P407	DOI 10.3171/jns.1991.74.3.0407
Marklund N	2011	BRIT J PHARMACOL	V164	P1207	DOI 10.1111/j.1476-5381.2010.01163.x
Masel BE	2001	ARCH PHYS MED REHAB	V82	P1526	DOI 10.1053/apmr.2001.26093
Masel BE	2010	J NEUROTRAUM	V27	P1529	DOI 10.1089/neu.2010.1358
Matute C	2012	ASN NEURO	V4	P89	DOI 10.1042/AN20110060
Maxwell WL	2005	J NEUROTRAUM	V22	P873	DOI 10.1089/neu.2005.22.873
Mayer CL	2013	HEADACHE	V53	P1523	DOI 10.1111/head.12173
MCCLAIN CJ	1987	J LAB CLIN MED	V110	P48
McConeghy KW	2012	CNS DRUGS	V26	P613	DOI 10.2165/11634020-000000000-00000
McCrory P	2013	PM&R	V5	P255	DOI 10.1016/j.pmrj.2013.02.012
McDonald JW	1998	NAT MED	V4	P291	DOI 10.1038/nm0398-291
MCLEAN A	1984	NEUROSURGERY	V14	P393	DOI 10.1227/00006123-198404000-00001
Meng YL	2011	J NEUROSURG	V115	P550	DOI 10.3171/2011.3.JNS101721
Menniti FS	2000	NEUROPHARMACOLOGY	V39	P1147	DOI 10.1016/S0028-3908(99)00211-7
Miller DM	2014	J NEUROTRAUM	V31	P1194	DOI 10.1089/neu.2013.3218
Miller DM	2013	FREE RADICAL BIO MED	V57	P1	DOI 10.1016/j.freeradbiomed.2012.12.011
MILLER LP	1990	BRAIN RES	V526	P103	DOI 10.1016/0006-8993(90)90254-9
Morganti-Kossmann Maria Cristina	2002	Curr Opin Crit Care	V8	P101
Mouzon BC	2014	ANN NEUROL	V75	P241	DOI 10.1002/ana.24064
Narayan RK	2002	J NEUROTRAUM	V19	P503	DOI 10.1089/089771502753754037
Nielson JL	2014	J NEUROTRAUM	V31	P1789	DOI 10.1089/neu.2014.3399
NILSSON P	1990	J CEREBR BLOOD F MET	V10	P631	DOI 10.1038/jcbfm.1990.115
Nonaka M	1999	J NEUROTRAUM	V16	P1023	DOI 10.1089/neu.1999.16.1023
Oda Y	2011	J CEREBR BLOOD F MET	V31	P1143	DOI 10.1038/jcbfm.2010.208
Ottens AK	2008	J NEUROCHEM	V104	P1404	DOI 10.1111/j.1471-4159.2007.05086.x
Palacios EM	2013	J NEUROTRAUM	V30	P1991	DOI 10.1089/neu.2012.2836
PALMER AM	1993	J NEUROCHEM	V61	P2015	DOI 10.1111/j.1471-4159.1993.tb07437.x
Pearl PL	2013	EPILEPSIA	V54	pe135	DOI 10.1111/epi.12326
Pierce JES	1996	J NEUROSCI	V16	P1083
Pierce JES	1998	NEUROSCIENCE	V87	P359	DOI 10.1016/S0306-4522(98)00142-0
Piilgaard H	2011	J CEREBR BLOOD F MET	V31	P1588	DOI 10.1038/jcbfm.2011.28
Plassman BL	2000	NEUROLOGY	V55	P1158	DOI 10.1212/WNL.55.8.1158
POVLISHOCK JT	1995	J NEUROTRAUM	V12	P555	DOI 10.1089/neu.1995.12.555
POVLISHOCK JT	1992	BRAIN PATHOL	V2	P1
Raghupathi R	2004	BRAIN PATHOL	V14	P215	DOI 10.1111/j.1750-3639.2004.tb00056.x
Ramlackhansingh AF	2011	ANN NEUROL	V70	P374	DOI 10.1002/ana.22455
RangeL-Castilla L	2008	NEUROSURG FOCUS	V25	DOI 10.3171/FOC.2008.25.10.E7
Reeves TM	2010	BRAIN PATHOL	V20	P1055	DOI 10.1111/j.1750-3639.2010.00412.x
Rodriguez-Paez AC	2005	ACTA NEUROPATHOL	V109	P603	DOI 10.1007/s00401-005-1010-z
Rodriguez-Rodriguez A	2014	CURR MED CHEM	V21	P1201	DOI 10.2174/0929867321666131217153310
Rosenfeld JV	2013	LANCET NEUROL	V12	P882	DOI 10.1016/S1474-4422(13)70161-3
Santhakumar V	2001	ANN NEUROL	V50	P708	DOI 10.1002/ana.1230
Santhakumar V	2000	J PHYSIOL-LONDON	V524	P117	DOI 10.1111/j.1469-7793.2000.00117.x
Satchell MA	2003	J NEUROCHEM	V85	P697	DOI 10.1046/j.1471-4159.2003.01707.x
Schenk D	2012	CSH PERSPECT MED	V2	DOI 10.1101/cshperspect.a006387
Schneeberger A	2012	Parkinsonism Relat Disord	V18 Suppl 1	pS11	DOI 10.1016/S1353-8020(11)70006-2
Schneider HJ	2007	JAMA-J AM MED ASSOC	V298	P1429	DOI 10.1001/jama.298.12.1429
Schoch KM	2013	J NEUROCHEM	V125	P909	DOI 10.1111/jnc.12144
Schoch KM	2012	EXP NEUROL	V236	P371	DOI 10.1016/j.expneurol.2012.04.022
SHAPIRA Y	1990	Journal of Neurotrauma	V7	P131	DOI 10.1089/neu.1990.7.131
SHERRIFF FE	1994	ACTA NEUROPATHOL	V87	P55
Shohami E	2014	CNS NEUROL DISORD-DR	V13	P567	DOI 10.2174/18715273113126660196
Sick J	2013	SOURCE CODE BIOL MED	V8	DOI 10.1186/1751-0473-8-12
Sierra A	2010	CELL STEM CELL	V7	P483	DOI 10.1016/j.stem.2010.08.014
Siman R	2013	FRONT NEUROL	V4	DOI 10.3389/fneur.2013.00190
Singh IN	2013	J CEREBR BLOOD F MET	V33	P593	DOI 10.1038/jcbfm.2012.211
Singh N	2014	J NEUROINFLAMM	V11	DOI 10.1186/1742-2094-11-1
Smith C	2013	NEUROPATH APPL NEURO	V39	P654	DOI 10.1111/nan.12008
Smith DH	1997	J NEUROTRAUM	V14	P715	DOI 10.1089/neu.1997.14.715
Spalding KL	2013	CELL	V153	P1219	DOI 10.1016/j.cell.2013.05.002
Stein SC	2004	NEUROCRIT CARE	V1	P479	DOI 10.1385/NCC:1:4:479
Stein SC	2004	NEUROSURGERY	V54	P687	DOI 10.1227/01.NEU.0000108641.98845.88
Steward O	2012	EXP NEUROL	V233	P597	DOI 10.1016/j.expneurol.2011.06.017
Stewart TH	2010	J NEUROPHYSIOL	V104	P3345	DOI 10.1152/jn.00398.2010
Stoica BA	2014	J NEUROTRAUM	V31	P758	DOI 10.1089/neu.2013.3194
Sun D	2007	EXP NEUROL	V204	P264	DOI 10.1016/j.expneurol.2006.11.005
SUTULA T	1988	SCIENCE	V239	P1147	DOI 10.1126/science.2449733
Swartz BE	2006	EPILEPSIA	V47	P1373	DOI 10.1111/j.1528-1167.2006.00602.x
Tehranian R	2002	J NEUROTRAUM	V19	P939	DOI 10.1089/089771502320317096
Temkin NR	2009	EPILEPSIA	V50	P10	DOI 10.1111/j.1528-1167.2008.02005.x
Thompson SN	2006	EXP NEUROL	V201	P253	DOI 10.1016/j.expneurol.2006.04.013
Tomura S	2012	J CEREBR BLOOD F MET	V32	P1939	DOI 10.1038/jcbfm.2012.99
Uchino Hiroyuki	2013	Acta Neurochir Suppl	V118	P311	DOI 10.1007/978-3-7091-1434-6_61
Ueda Y	2013	NEUROCHEM RES	V38	P1399	DOI 10.1007/s11064-013-1037-9
Ueda Y	2011	NEUROCHEM RES	V36	P1323	DOI 10.1007/s11064-010-0386-x
Urrea C	2007	RESTOR NEUROL NEUROS	V25	P65
Uzan M	2006	ACTA NEUROCHIR	V148	P1157	DOI 10.1007/s00701-006-0887-1
Vaccari JPDR	2008	J NEUROSCI	V28	P3404	DOI 10.1523/JNEUROSCI.0157-08.2008
Vaccari JPD	2014	J CEREBR BLOOD F MET	V34	P369	DOI 10.1038/jcbfm.2013.227
van der Naalt J	1999	ANN NEUROL	V46	P70	DOI 10.1002/1531-8249(199907)46:1<70::AID-ANA11>3.0.CO;2-L
Vespa P	1998	J NEUROSURG	V89	P971	DOI 10.3171/jns.1998.89.6.0971
Vespa PM	2010	NEUROLOGY	V75	P792	DOI 10.1212/WNL.0b013e3181f07334
Vespa PM	2013	CURR OPIN CRIT CARE	V19	P107	DOI 10.1097/MCC.0b013e32835e7420
Vespa PM	1999	J NEUROSURG	V91	P750	DOI 10.3171/jns.1999.91.5.0750
Vitarbo EA	2004	NEUROSURGERY	V55	P416	DOI 10.1227/01.NEU.0000130036.52521.2C
Wagner AK	2011	J CEREBR BLOOD F MET	V31	P1886	DOI 10.1038/jcbfm.2011.31
Wang K. K. W.	2013	SYSTEMS BIOMARKERS A
WAXMAN SG	1989	J NEUROL SCI	V91	P1	DOI 10.1016/0022-510X(89)90072-5
WEI EP	1980	CIRC RES	V46	P37	DOI 10.1161/01.RES.46.1.37
Willmore LJ	2009	NEUROCHEM RES	V34	P688	DOI 10.1007/s11064-008-9841-3
Willmore LJ	2012	EPILEPSY CURR	V12	P87	DOI 10.5698/1535-7511-12.3.87
Wong J	2005	NEUROCRIT CARE	V3	P177	DOI 10.1385/NCC:3:2:177
Wu HM	2013	J NEUROTRAUM	V30	P352	DOI 10.1089/neu.2012.2610
Xiao GM	2008	CRIT CARE	V12	DOI 10.1186/cc6887
Xiong Y	2013	NAT REV NEUROSCI	V14	P128	DOI 10.1038/nrn3407
Yakovlev AG	2001	MOL NEUROBIOL	V24	P131
Yenari MA	2000	BRAIN RES	V885	P208	DOI 10.1016/S0006-8993(00)02942-5
Zauner A	1996	ACT NEUR S	V67	P40
Zhang XP	2005	CRIT CARE	V9	P66	DOI 10.1186/cc2950
Zhang YL	2012	EXP NEUROL	V235	P336	DOI 10.1016/j.expneurol.2012.02.015
Zhao CM	2008	CELL	V132	P645	DOI 10.1016/j.cell.2008.01.033
Zhao CM	2006	J NEUROSCI	V26	P3	DOI 10.1523/JNEUROSCI.3648-05.2006
Ziebell JM	2010	NEUROTHERAPEUTICS	V7	P22	DOI 10.1016/j.nurt.2009.10.016
NR 262
TC 235
Z9 241
U1 4
U2 34
PU MARY ANN LIEBERT	INC
PI NEW ROCHELLE
PA 140 HUGUENOT STREET	3RD FL	NEW ROCHELLE	NY 10801 USA
SN 0897-7151
EI 1557-9042
J9 J NEUROTRAUM
JI J. Neurotrauma
PD DEC 1
PY 2015
VL 32
IS 23
SI SI
BP 1834
EP 1848
DI 10.1089/neu.2014.3352
PG 15
WC Critical Care Medicine; Clinical Neurology; Neurosciences
WE Science Citation Index Expanded (SCI-EXPANDED)
SC General & Internal Medicine; Neurosciences & Neurology
GA CX4TW
UT WOS:000365694200002
PM 25158206
OA Green Published
DA 2023-09-03
ER
PT J
AU Sekhon	LHS
Fehlings	MG
AF Sekhon	LHS
Fehlings	MG
TI Epidemiology	demographics	and pathophysiology of acute spinal cord
injury
SO SPINE
LA English
DT Review
DE epidemiology; methylprednisolone; pathophysiology; spinal cord injury;
surgery
ID SCANNING ELECTRON-MICROSCOPY; RANDOMIZED CONTROLLED TRIAL; VASCULAR
CORROSION CASTS; 1-YEAR FOLLOW-UP; BLOOD-FLOW; LIPID-PEROXIDATION;
SECONDARY INJURY; 3-DIMENSIONAL ANALYSIS; NEUROLOGICAL FUNCTION;
COMPRESSION TRAUMA
AB Spinal cord injury occurs through various countries throughout the world with an annual incidence of 15 to 40 cases per million	with the causes of these injuries ranging from motor vehicle accidents and community violence to recreational activities and workplace-related injuries. Survival has improved along with a greater appreciation of patterns of presentation	survival	and complications. Despite much work having been done	the only treatment to date known to ameliorate neurologic dysfunction that occurs at or below the level of neurologic injury has been intravenous methylprednisolone therapy. Much research over the past 30 to 40 years has focused on elucidating the mechanisms of spinal cord injury	with the complex pathophysiologic processes slowly being unraveled. With a greater understanding of both primary and secondary mechanisms of injury	the roles of calcium	free radicals	sodium	excitatory amino acids	vascular mediators	and apoptosis have been elucidated. This review examines the epidemiology	demographics	and pathophysiology of acute spinal cord injury.
C1 Univ Toronto	Spinal Program	Hlth Network	Toronto	ON M5T 2S8	Canada.
Royal N Shore Hosp	Dept Neurosurg	Sydney	NSW	Australia.
Dalcross Private Hosp	Sydney	NSW	Australia.
Univ Sydney	Sydney	NSW 2006	Australia.
Toronto Gen Hosp	Div Neurosurg	Toronto	ON	Canada.
C3 University of Toronto; University Health Network Toronto; Royal North
Shore Hospital; University of Sydney; University of Sydney; University
of Toronto; University Health Network Toronto; Toronto General Hospital
RP Fehlings	MG (corresponding author)	Univ Toronto	Spinal Program	Hlth Network	Suite 2-417	399 Bathurst St	Toronto	ON M5T 2S8	Canada.
EM Michael.Fehlings@uhn.on.ca
OI Fehlings	Michael G./0000-0002-5722-6364
CR Agrawal SK	1996	J NEUROSCI	V16	P545
Agrawal SK	1997	J NEUROSCI	V17	P1055
ALBIN MS	1987	CRIT CARE CLIN	V3	P441
Allen A.R.	1911	JAMA-J AM MED ASSOC	V57	P878	DOI [10.1001/jama.1911.04260090100008	DOI 10.1001/JAMA.1911.04260090100008]
Allen AR	1914	J NERV MENT DIS	V41	P141	DOI 10.1097/00005053-191403000-00002
Anderson D K	1985	Cent Nerv Syst Trauma	V2	P257
ANDERSON DK	1993	ANN EMERG MED	V22	P987	DOI 10.1016/S0196-0644(05)82739-8
ANDERSON DK	1980	J NEUROSURG	V53	P375	DOI 10.3171/jns.1980.53.3.0375
ANDERSON DK	1982	J NEUROSURG	V56	P106	DOI 10.3171/jns.1982.56.1.0106
ANDERSON DW	1980	J NEUROSURG S NOV	pS32
[Anonymous]	2000	CELLULAR IONIC BIOMO
ARENDS MJ	1991	INT REV EXP PATHOL	V32	P223
ASSENMAC.DR	1971	J BONE JOINT SURG AM	VA 53	P671	DOI 10.2106/00004623-197153040-00006
Atkinson PP	1996	MAYO CLIN PROC	V71	P384	DOI 10.4065/71.4.384
BALENTINE JD	1978	LAB INVEST	V39	P254
BARGMANN C I	1991	Current Biology	V1	P388	DOI 10.1016/0960-9822(91)90202-8
BARRES BA	1993	CURR BIOL	V3	P489	DOI 10.1016/0960-9822(93)90039-Q
Bauer J	1995	CURR OPIN IMMUNOL	V7	P839	DOI 10.1016/0952-7915(95)80057-3
BINGHAM WG	1975	J NEUROSURG	V43	P162	DOI 10.3171/jns.1975.43.2.0162
Botterell E H	1975	Can J Neurol Sci	V2	P361
BRACKEN MB	1984	JAMA-J AM MED ASSOC	V251	P45	DOI 10.1001/jama.251.1.45
BRACKEN MB	1985	J NEUROSURG	V63	P704	DOI 10.3171/jns.1985.63.5.0704
BRACKEN MB	1993	J NEUROSURG	V79	P500	DOI 10.3171/jns.1993.79.4.0500
BRACKEN MB	1990	NEW ENGL J MED	V322	P1405	DOI 10.1056/NEJM199005173222001
Bracken MB	1998	J NEUROSURG	V89	P699	DOI 10.3171/jns.1998.89.5.0699
BRACKEN MB	1992	J NEUROSURG	V76	P23	DOI 10.3171/jns.1992.76.1.0023
Bracken MB	1997	JAMA-J AM MED ASSOC	V277	P1597	DOI 10.1001/jama.277.20.1597
Bracken MB	1991	J NEUROTRAUM	V8	P85
BUCHANAN IE	1990	PA MED	V93	P36
BURNEY RE	1993	ARCH SURG-CHICAGO	V128	P596
CARTER RE	1977	TEX MED	V73	P61
Casha S	2001	NEUROSCIENCE	V103	P203	DOI 10.1016/S0306-4522(00)00538-8
Claxton AR	1998	CAN J ANAESTH	V45	P144	DOI 10.1007/BF03013253
COHEN JJ	1993	IMMUNOL TODAY	V14	P126	DOI 10.1016/0167-5699(93)90214-6
COLLINS WF	1983	PARAPLEGIA	V21	P204	DOI 10.1038/sc.1983.34
Crowe MJ	1997	NAT MED	V3	P73	DOI 10.1038/nm0197-73
DAVIDOFF G	1990	ARCH PHYS MED REHAB	V71	P121
DELABAUME S	1981	NEUROSCIENCE	V6	P315	DOI 10.1016/0306-4522(81)90125-1
Demopoulos H	1979	NEURAL TRAUMA	P63
DEMOPOULOS HB	1982	CAN J PHYSIOL PHARM	V60	P1415	DOI 10.1139/y82-210
DEMOPOULOS HB	1980	ACTA PHYSIOL SCAND	P91
DEMOPOULOS HB	1978	SCAN ELECTRON MICROS	V2	P677
DEVIVO MJ	1989	ARCH INTERN MED	V149	P1761	DOI 10.1001/archinte.149.8.1761
DEVIVO MJ	1992	ARCH PHYS MED REHAB	V73	P424
DEVIVO MJ	1992	ARCH PHYS MED REHAB	V73	P156
DEVIVO MJ	1980	ARCH NEUROL-CHICAGO	V37	P707	DOI 10.1001/archneur.1980.00500600055011
Dohrmann G J	1973	Surg Neurol	V1	P209
DOHRMANN GJ	1975	J TRAUMA	V15	P1003	DOI 10.1097/00005373-197511000-00011
DUCATI A	1984	SURG NEUROL	V21	P405	DOI 10.1016/0090-3019(84)90122-8
DUSART I	1994	EUR J NEUROSCI	V6	P712	DOI 10.1111/j.1460-9568.1994.tb00983.x
EISMONT FJ	1984	SPINE	V9	P663	DOI 10.1097/00007632-198410000-00001
Emery E	1998	J NEUROSURG	V89	P911	DOI 10.3171/jns.1998.89.6.0911
Ergas Z	1985	Cent Nerv Syst Trauma	V2	P19
Exner G	1997	SPINAL CORD	V35	P415	DOI 10.1038/sj.sc.3100410
FADEN AI	1981	NEW ENGL J MED	V305	P1063	DOI 10.1056/NEJM198110293051806
FADEN AI	1984	J NEUROSURG	V60	P796	DOI 10.3171/jns.1984.60.4.0796
FADEN AI	1988	ANN NEUROL	V23	P623	DOI 10.1002/ana.410230618
FADEN AI	1982	NEUROLOGY	V32	P677	DOI 10.1212/WNL.32.6.677
FAIRHOLM D	1970	Surgical Forum (Chicago)	V21	P453
Fehlings MG	1996	AM FAM PHYSICIAN	V54	P155
FEHLINGS MG	1989	J NEUROSURG	V71	P403	DOI 10.3171/jns.1989.71.3.0403
FEHLINGS MG	1994	J NEUROSURG	V81	P341	DOI 10.3171/jns.1994.81.3.0341
Fehlings MG	1999	SPINE	V24	P605	DOI 10.1097/00007632-199903150-00023
FRIED LC	1971	J NEUROSURG	V35	P709	DOI 10.3171/jns.1971.35.6.0709
GJONE R	1978	PARAPLEGIA	V16	P88	DOI 10.1038/sc.1978.14
GRIFFIN MR	1985	AM J EPIDEMIOL	V121	P884	DOI 10.1093/oxfordjournals.aje.a114058
GRIFFIN MR	1985	J CHRON DIS	V38	P643	DOI 10.1016/0021-9681(85)90018-9
GRIFFITHS IR	1976	J NEUROL SCI	V27	P247	DOI 10.1016/0022-510X(76)90065-4
GRIFFITHS IR	1974	J NEUROL SCI	V22	P291	DOI 10.1016/0022-510X(74)90002-1
GUHA A	1988	J TRAUMA	V28	P481	DOI 10.1097/00005373-198804000-00011
GUHA A	1989	STROKE	V20	P372	DOI 10.1161/01.STR.20.3.372
HACHEN HJ	1977	J TRAUMA	V17	P931	DOI 10.1097/00005373-197712000-00006
Hall E D	1987	Cent Nerv Syst Trauma	V4	P15
HALL E D	1989	Journal of Neurotrauma	V6	P169	DOI 10.1089/neu.1989.6.169
HALL ED	1982	SURG NEUROL	V18	P320	DOI 10.1016/0090-3019(82)90140-9
HALL ED	1993	RES P ARNMD	V71	P81
HALL ED	1982	J NEUROSURG	V57	P247	DOI 10.3171/jns.1982.57.2.0247
HALL ED	1984	J NEUROSURG	V61	P124	DOI 10.3171/jns.1984.61.1.0124
HARRIS P	1985	PARAPLEGIA	V23	P1	DOI 10.1038/sc.1985.1
HARRIS P	1980	PARAPLEGIA	V18	P324	DOI 10.1038/sc.1980.59
HARVEY C	1992	PARAPLEGIA	V30	P834	DOI 10.1038/sc.1992.160
HARVEY C	1990	PARAPLEGIA	V28	P537	DOI 10.1038/sc.1990.73
HAYASHI N	1983	J NEUROSURG	V58	P516	DOI 10.3171/jns.1983.58.4.0516
HEINEMANN AW	1989	ARCH NEUROL-CHICAGO	V46	P1098	DOI 10.1001/archneur.1989.00520460084017
Henderson CE	1996	NEURON	V17	P579	DOI 10.1016/S0896-6273(00)80191-9
HOCKENBERY D	1995	AM J PATHOL	V146	P16
HSU CY	1985	J NEUROL SCI	V70	P275	DOI 10.1016/0022-510X(85)90169-8
HUNG T-K	1975	Surgical Neurology	V4	P271
KIM RC	1984	ANN NEUROL	V15	P379	DOI 10.1002/ana.410150413
KOBRINE AI	1975	J NEUROSURG	V42	P144	DOI 10.3171/jns.1975.42.2.0144
KOYANAGI I	1993	NEUROSURGERY	V32	P260	DOI 10.1227/00006123-199302000-00015
KOYANAGI I	1993	NEUROSURGERY	V33	P277
KOYANAGI I	1993	NEUROSURGERY	V33	P285	DOI 10.1227/00006123-199308000-00016
Kraus J F	1978	Adv Neurol	V19	P261
Kraus J.F.	1996	PRINCIPLES SPINE SUR	P41
KRAUS JF	1975	J CHRON DIS	V28	P471	DOI 10.1016/0021-9681(75)90057-0
KRAUS JF	1980	J NEUROSURG S	pS3
KURIHARA M	1985	J NEUROSURG	V62	P743	DOI 10.3171/jns.1985.62.5.0743
KURTZKE JF	1975	EXP NEUROL	V48	P163	DOI 10.1016/0014-4886(75)90175-2
Li GL	1996	J NEUROPATH EXP NEUR	V55	P280	DOI 10.1097/00005072-199603000-00003
Liu XZ	1997	J NEUROSCI	V17	P5395
Lou J	1998	SPINAL CORD	V36	P683	DOI 10.1038/sj.sc.3100632
Lou J	1998	SPINE	V23	P517	DOI 10.1097/00007632-199803010-00001
MAINO G	1995	AM J PATHOL	V146	P3
MAYNARD FM	1989	P NAT CONS C CAT ILL	P57
Meguro K	1988	Neurol Med Chir (Tokyo)	V28	P34	DOI 10.2176/nmc.28.34
Meinecke F W	1973	Proc Veterans Adm Spinal Cord Inj Conf	P205
Meyer P R Jr	1984	Emerg Med Clin North Am	V2	P313
MILVY P	1973	ANN NY ACAD SCI	V222	P1102	DOI 10.1111/j.1749-6632.1973.tb15327.x
MINAIRE P	1978	PARAPLEGIA	V16	P76	DOI 10.1038/sc.1978.13
Namura S	1998	J NEUROSCI	V18	P3659
Nemecek S	1978	Adv Neurol	V20	P395
OHSHIO I	1993	SPINE	V18	P1140	DOI 10.1097/00007632-199307000-00005
OSTERHOLM JL	1972	J NEUROSURG	V36	P395	DOI 10.3171/jns.1972.36.4.0395
PENDER MP	1991	J NEUROL SCI	V104	P81	DOI 10.1016/0022-510X(91)90219-W
PIETRONIGRO DD	1983	J NEUROCHEM	V41	P1072	DOI 10.1111/j.1471-4159.1983.tb09053.x
RAO KR	1982	J NEUROL SCI	V56	P107	DOI 10.1016/0022-510X(82)90065-X
RINK A	1995	AM J PATHOL	V147	P1575
RIVLIN AS	1978	J NEUROSURG	V49	P844	DOI 10.3171/jns.1978.49.6.0844
SANCES A	1984	CRIT REV BIOMED ENG	V11	P1
SANDLER AN	1976	J NEUROSURG	V45	P660	DOI 10.3171/jns.1976.45.6.0660
SAUNDERS RD	1987	J NEUROCHEM	V49	P24	DOI 10.1111/j.1471-4159.1987.tb03388.x
SENTER HJ	1979	J NEUROSURG	V50	P198	DOI 10.3171/jns.1979.50.2.0198
SENTER HJ	1978	J NEUROSURG	V49	P569	DOI 10.3171/jns.1978.49.4.0569
SHINGU H	1989	PARAPLEGIA	V27	P182	DOI 10.1038/sc.1989.27
Shuman SL	1997	J NEUROSCI RES	V50	P798	DOI 10.1002/(SICI)1097-4547(19971201)50:5<798::AID-JNR16>3.3.CO;2-#
Springer JE	1999	NAT MED	V5	P943	DOI 10.1038/11387
STEWART WB	1979	BRAIN RES	V169	P163	DOI 10.1016/0006-8993(79)90382-2
STOVER SL	1987	PARAPLEGIA	V25	P225	DOI 10.1038/sc.1987.40
Stripling T.	1990	PARAPLEGIA NEWS	V8	P50
Sutherland M W	1993	SCI Nurs	V10	P91
TAOKA Y	1995	PARAPLEGIA	V33	P450	DOI 10.1038/sc.1995.98
Tator C H	1983	Clin Neurosurg	V30	P479
TATOR CH	1991	NEUROCHIRURGIE	V37	P291
TATOR CH	1993	PARAPLEGIA	V31	P700	DOI 10.1038/sc.1993.112
Tator CH	1997	J NEUROSURG	V86	P483	DOI 10.3171/jns.1997.86.3.0483
TATOR CH	1993	SURG NEUROL	V40	P207	DOI 10.1016/0090-3019(93)90069-D
TATOR CH	1995	BRAIN PATHOL	V5	P407	DOI 10.1111/j.1750-3639.1995.tb00619.x
TATOR CH	1991	J NEUROSURG	V75	P15	DOI 10.3171/jns.1991.75.1.0015
TATOR CH	2000	CONT MANAGEMENT SPIN	P15
WAGNER FC	1981	J NEUROSURG	V54	P802	DOI 10.3171/jns.1981.54.6.0802
WALLACE MC	1986	NEUROSURGERY	V18	P433
WELLS JD	1978	SURG NEUROL	V10	P200
WOLMAN L	1965	Paraplegia	V2	P213
Young J S	1979	Adv Neurol	V22	P255
YOUNG W	1986	BRAIN RES	V365	P42	DOI 10.1016/0006-8993(86)90720-1
YOUNG W	1980	J NEUROSURG	V52	P473	DOI 10.3171/jns.1980.52.4.0473
YOUNG W	1982	J NEUROSURG	V56	P706	DOI 10.3171/jns.1982.56.5.0706
YOUNG W	1982	J NEUROSURG	V57	P667	DOI 10.3171/jns.1982.57.5.0667
NR 149
TC 902
Z9 969
U1 3
U2 139
PU LIPPINCOTT WILLIAMS & WILKINS
PI PHILADELPHIA
PA TWO COMMERCE SQ	2001 MARKET ST	PHILADELPHIA	PA 19103 USA
SN 0362-2436
EI 1528-1159
J9 SPINE
JI SPINE
PD DEC 15
PY 2001
VL 26
IS 24
SU S
BP S2
EP S12
DI 10.1097/00007632-200112151-00002
PG 11
WC Clinical Neurology; Orthopedics
WE Science Citation Index Expanded (SCI-EXPANDED)
SC Neurosciences & Neurology; Orthopedics
GA 509NN
UT WOS:000173154000002
PM 11805601
OA Bronze
DA 2023-09-03
ER
PT J
AU Li	DT
Wang	PP
Luo	YH
Zhao	MY
Chen	F
AF Li	Daotong
Wang	Pengpu
Luo	Yinghua
Zhao	Mengyao
Chen	Fang
TI Health benefits of anthocyanins and molecular mechanisms: Update from
recent decade
SO CRITICAL REVIEWS IN FOOD SCIENCE AND NUTRITION
LA English
DT Review
DE Anthocyanins; benefits; mechanism; anti-cancer activity;
anti-inflammation activity; neuroprotective activity
ID E-DEFICIENT MICE; SPINAL-CORD-INJURY; RICH EXTRACT; IN-VITRO;
ENDOTHELIAL-CELLS; COLON-CANCER; HEPATOCELLULAR-CARCINOMA;
CARDIOVASCULAR-DISEASE; MART. FRUIT; MOUSE MODEL
AB Anthocyanins are one of the most widespread families of natural pigments in the plant kingdom. Their health beneficial effects have been documented in many in vivo and in vitro studies. This review summarizes the most recent literature regarding the health benefits of anthocyanins and their molecular mechanisms. It appears that several signaling pathways	including mitogen- activated protein kinase	nuclear factor B-k	AMP- activated protein kinase	and Wnt/ beta- catenin	as well as some crucial cellular processes	such as cell cycle	apoptosis	autophagy	and biochemical metabolism	are involved in these beneficial effects and may provide potential therapeutic targets and strategies for the improvement of a wide range of diseases in future. In addition	specific anthocyanin metabolites contributing to the observed in vivo biological activities	structure- activity relationships as well as additive and synergistic efficacy of anthocyanins are also discussed.
Abbreviations: ABCA1: ATP- binding cassette transporter A1; ABCG1: ATP- binding cassette transporter G1; ACC: acetyl- CoA carboxylase; ACO: acyl- CoA oxidase; AD: Alzheimer's disease; AIF: apoptosis- inducing factor; AMPK: AMPactivated protein kinase; AP- 1: activator protein- 1; aP2: adipocyte fatty acid binding protein; apo E-/-: apolipoprotein E- deficient; APP: amyloid precursor protein; Atg5…	5-b] pyridine; PKCz: protein kinase C z; PPAR gamma: peroxisome proliferator-activated receptor gamma; Pt: petunidin; RCT: reverse cholesterol transport; ROS: reactive oxygen species; RR-ARFs: anthocyanin-rich fractions from red raspberries; SCI: spinal cord injury; SGLT1: sodium-dependent glucose transporter 1; STAT3: signal transducers and activators of transcription 3; TG: triglycerides; TNF: …
C1 [Li	Daotong; Wang	Pengpu; Zhao	Mengyao; Chen	Fang] China Agr Univ	Natl Engn Res Ctr Fruit & Vegetable Proc	Key Lab Fruits & Vegetables Proc	Coll Food Sci & Nutr Engn	Minist Agr	Beijing	Peoples R China.
[Li	Daotong; Wang	Pengpu; Zhao	Mengyao; Chen	Fang] China Agr Univ	Engn Res Ctr Fruits & Vegetables Proc	Minist Educ	Beijing	Peoples R China.
[Luo	Yinghua] Univ Maryland	Dept Nutr & Food Sci	College Pk	MD 20742 USA.
C3 China Agricultural University; Ministry of Agriculture & Rural Affairs;
China Agricultural University; University System of Maryland; University
of Maryland College Park
RP Chen	F (corresponding author)	China Agr Univ	Coll Food Sci & Nutr Engn	17	East Qinghua Rd	Beijing 100083	Peoples R China.
EM chenfangch@sina.com
RI luo	ying/HJP-8548-2023
OI Zhao	Mengyao/0000-0002-5038-8504
FU Program for New Century Excellent Talents in University (NCET)
[12-0520]; National Basic Research Program of China (973 Program)
[2012CB720805]; National Natural Science Foundation of China (NSFC)
[81102152]; National Science & Technology Support Plan of the Chinese
Ministry of Education [2011BAD39B00]
FX This work was supported by Program for New Century Excellent Talents in
University (NCET) No. 12-0520	the National Basic Research Program of
China (973 Program) No. 2012CB720805	and the National Natural Science
Foundation of China (NSFC) No. 81102152	and the National Science &
Technology Support Plan of the Chinese Ministry of Education No.
2011BAD39B00.
CR Afaq F	2005	INT J CANCER	V113	P423	DOI 10.1002/ijc.20587
Akiyama S	2012	BIOFACTORS	V38	P226	DOI 10.1002/biof.1008
Alzaid F	2013	PLOS ONE	V8	DOI 10.1371/journal.pone.0078932
Andersen O. M.	2001	ANTHOCYANINS
Andersen O. M.	2006	FLAVONOIDS CHEM BIOC
[Anonymous]	1993	ANTHOCYANINS FRUITS	DOI DOI 10.1201/9781351069700
Aqil F	2012	NUTR CANCER	V64	P428	DOI 10.1080/01635581.2012.657766
Hassimotto NMA	2013	BIOMED RES INT	V2013	DOI 10.1155/2013/146716
Barrios J	2010	J AGR FOOD CHEM	V58	P2100	DOI 10.1021/jf9041497
Bishayee A	2011	J NUTR BIOCHEM	V22	P1035	DOI 10.1016/j.jnutbio.2010.09.001
Bishayee A	2010	NAT PROD COMMUN	V5	P1613
Bobe G	2006	J AGR FOOD CHEM	V54	P9322	DOI 10.1021/jf0612169
Bunea A	2013	PHYTOCHEMISTRY	V95	P436	DOI 10.1016/j.phytochem.2013.06.018
Cassidy A	2013	CIRCULATION	V127	P188	DOI 10.1161/CIRCULATIONAHA.112.122408
Chang H	2010	NUTR CANCER	V62	P1128	DOI 10.1080/01635581.2010.494821
Dai J	2009	FOOD CHEM TOXICOL	V47	P837	DOI 10.1016/j.fct.2009.01.016
de Pascual-Teresa S	2014	ARCH BIOCHEM BIOPHYS	V559	P68	DOI 10.1016/j.abb.2014.04.012
de Pascual-Teresa Sonia	2008	Phytochemistry Reviews	V7	P281	DOI 10.1007/s11101-007-9074-0
Devi PS	2011	INT J BREAST CANCER	V2011	DOI 10.4061/2011/891481
Edirisinghe I	2011	BRIT J NUTR	V106	P913	DOI 10.1017/S0007114511001176
Fernandes I	2014	J FUNCT FOODS	V7	P54	DOI 10.1016/j.jff.2013.05.010
Filipiak K	2014	FOOD FUNCT	V5	P381	DOI 10.1039/c3fo60465a
Forester SC	2014	MOL CARCINOGEN	V53	P432	DOI 10.1002/mc.21974
Ghosh D	2007	ASIA PAC J CLIN NUTR	V16	P200
Graf D	2013	PLOS ONE	V8	DOI 10.1371/journal.pone.0066690
Guo HH	2007	PLANT FOOD HUM NUTR	V62	P1	DOI 10.1007/s11130-006-0031-7
Guo HH	2012	FOOD CHEM TOXICOL	V50	P3040	DOI 10.1016/j.fct.2012.06.015
Guo HH	2011	J LIPID RES	V52	P908	DOI 10.1194/jlr.M013375
Hagiwara A	2001	CANCER LETT	V171	P17	DOI 10.1016/S0304-3835(01)00510-9
He JA	2010	ANNU REV FOOD SCI T	V1	P163	DOI 10.1146/annurev.food.080708.100754
Hou DX	2005	BIOCHEM PHARMACOL	V70	P417	DOI 10.1016/j.bcp.2005.05.003
Hung TC	2014	EVID-BASED COMPL ALT	V2014	DOI 10.1155/2014/450592
Hwa KS	2011	PHYTOTHER RES	V25	P1415	DOI 10.1002/ptr.3421
Jang H	2010	J AGR FOOD CHEM	V58	P12686	DOI 10.1021/jf102688g
Jing P	2008	J AGR FOOD CHEM	V56	P9391	DOI 10.1021/jf8005917
Jurgonski A	2013	NUTRITION	V29	P898	DOI 10.1016/j.nut.2012.11.006
Kao ES	2009	CHEM-BIOL INTERACT	V179	P212	DOI 10.1016/j.cbi.2009.01.009
Kay CD	2006	NUTR RES REV	V19	P137	DOI 10.1079/NRR2005116
Kim KT	2011	J KOREAN NEUROSURG S	V49	P205	DOI 10.3340/jkns.2011.49.4.205
Kim YK	2012	BIOMOL THER	V20	P68	DOI 10.4062/biomolther.2012.20.1.068
Kocic B	2011	J BUON	V16	P602
Koide T	1996	CANCER BIOTHER RADIO	V11	P273	DOI 10.1089/cbr.1996.11.273
Koide T	1997	CANCER BIOTHER RADIO	V12	P277	DOI 10.1089/cbr.1997.12.277
Konczak-Islam I	2003	J AGR FOOD CHEM	V51	P5916	DOI 10.1021/jf030066o
Lala G	2006	NUTR CANCER	V54	P84	DOI 10.1207/s15327914nc5401_10
Li GL	2013	J ACAD NUTR DIET	V113	P786	DOI 10.1016/j.jand.2013.01.018
Li L	2014	SCI REP-UK	V4	DOI 10.1038/srep06234
Lim S	2013	MOL NUTR FOOD RES	V57	P1908	DOI 10.1002/mnfr.201300040
Liu LK	2008	J FOOD SCI	V73	pH113	DOI 10.1111/j.1750-3841.2008.00801.x
Liu Y	2014	AM J PHYSIOL-ENDOC M	V306	pE975	DOI 10.1152/ajpendo.00699.2013
Longo L	2008	MOL CANCER THER	V7	P2476	DOI 10.1158/1535-7163.MCT-08-0361
Lu XL	2014	FOOD FUNCT	V5	P2892	DOI 10.1039/c4fo00391h
Malik M	2003	NUTR CANCER	V46	P186	DOI 10.1207/S15327914NC4602_12
Mauray A	2012	NUTR METAB CARDIOVAS	V22	P72	DOI 10.1016/j.numecd.2010.04.011
Mauray A	2010	GENES NUTR	V5	P343	DOI 10.1007/s12263-010-0171-0
McGhie TK	2007	MOL NUTR FOOD RES	V51	P702	DOI 10.1002/mnfr.200700092
Min JY	2011	NEUROSCI LETT	V500	P157	DOI 10.1016/j.neulet.2011.05.048
Mink PJ	2007	AM J CLIN NUTR	V85	P895	DOI 10.1093/ajcn/85.3.895
Miyake S	2012	LAB INVEST	V92	P102	DOI 10.1038/labinvest.2011.132
Mpiana PT	2010	BLOOD TRANSFUS-ITALY	V8	P248	DOI [10.2450/2009.0120.09	10.2450/2009.0120-09]
Muraki I	2013	BMJ-BRIT MED J	V347	DOI 10.1136/bmj.f5001
NHANES	2001	NAT HLTH NUTR EX SUR
Paixao J	2011	APOPTOSIS	V16	P976	DOI 10.1007/s10495-011-0632-y
Park SY	2014	BMC COMPLEM ALTERN M	V14	DOI 10.1186/1472-6882-14-109
Peiffer DS	2014	CANCER PREV RES	V7	P574	DOI 10.1158/1940-6207.CAPR-14-0003
Poulose SM	2012	J AGR FOOD CHEM	V60	P1084	DOI 10.1021/jf203989k
Reddivari L	2007	CARCINOGENESIS	V28	P2227	DOI 10.1093/carcin/bgm117
RIMM EB	1991	LANCET	V338	P464	DOI 10.1016/0140-6736(91)90542-W
Rugina D	2012	J MED FOOD	V15	P700	DOI 10.1089/jmf.2011.0246
Samuels TL	2013	ANN OTO RHINOL LARYN	V122	P632	DOI 10.1177/000348941312201006
Shih PH	2010	J NUTR BIOCHEM	V21	P598	DOI 10.1016/j.jnutbio.2009.03.008
Singletary KW	2007	J MED FOOD	V10	P244	DOI 10.1089/jmf.2006.258
Sohn DW	2014	UROLOGY	V84	P1112	DOI 10.1016/j.urology.2014.06.026
Srivastava A	2007	J AGR FOOD CHEM	V55	P3180	DOI 10.1021/jf062915o
Strathearn KE	2014	BRAIN RES	V1555	P60	DOI 10.1016/j.brainres.2014.01.047
Takikawa M	2010	J NUTR	V140	P527	DOI 10.3945/jn.109.118216
Tall JM	2004	BEHAV BRAIN RES	V153	P181	DOI 10.1016/j.bbr.2003.11.011
Taverniti V	2014	J AGR FOOD CHEM	V62	P8346	DOI 10.1021/jf502180j
Tsai TC	2014	J AGR FOOD CHEM	V62	P1572	DOI 10.1021/jf405235j
Tsuda T	2002	J NUTR SCI VITAMINOL	V48	P305	DOI 10.3177/jnsv.48.305
Tsuda T	2004	BIOCHEM BIOPH RES CO	V316	P149	DOI 10.1016/j.bbrc.2004.02.031
Vepsalainen S	2013	J NUTR BIOCHEM	V24	P360	DOI 10.1016/j.jnutbio.2012.07.006
Wallace TC	2011	ADV NUTR	V2	P1	DOI 10.3945/an.110.000042
Wang CC	2013	DIABETES-METAB RES	V29	P398	DOI 10.1002/dmrr.2406
Wang DL	2012	CIRC RES	V111	P967	DOI [10.1161/CIRCRESAHA.112.266502	10.1161/circresaha.112.266502]
Wang J	2012	NEUROCHEM RES	V37	P2814	DOI 10.1007/s11064-012-0883-1
Wang LS	2008	CANCER LETT	V269	P281	DOI 10.1016/j.canlet.2008.05.020
Welch CR	2008	CURR ANAL CHEM	V4	P75	DOI 10.2174/157341108784587795
Wu T	2013	FOOD FUNCT	V4	P1654	DOI 10.1039/c3fo60251f
Wu XL	2006	J AGR FOOD CHEM	V54	P4069	DOI 10.1021/jf060300l
Xia M	2007	ARTERIOSCL THROM VAS	V27	P519	DOI 10.1161/01.ATV.0000254672.04573.2d
Xia M	2009	ATHEROSCLEROSIS	V202	P41	DOI 10.1016/j.atherosclerosis.2008.04.005
Xia XD	2006	J NUTR	V136	P2220	DOI 10.1093/jn/136.8.2220
Xiao JB	2015	CURR MED CHEM	V22	P23
Ye JL	2010	NEUROCHEM RES	V35	P357	DOI 10.1007/s11064-009-0063-0
Yoon B. I.	2013	CHIN J INTEGR MED	V14
You J	2010	THERIOGENOLOGY	V74	P777	DOI 10.1016/j.theriogenology.2010.04.002
Youdim KA	2004	FREE RADICAL BIO MED	V37	P1683	DOI 10.1016/j.freeradbiomed.2004.08.002
Zapolska-Downar D	2008	ANN NUTR METAB	V53	P283	DOI 10.1159/000191290
Zhao C	2004	J AGR FOOD CHEM	V52	P6122	DOI 10.1021/jf049517a
Zhu Y	2013	NUTR METAB CARDIOVAS	V23	P843	DOI 10.1016/j.numecd.2012.06.005
Zhu YN	2011	CLIN CHEM	V57	P1524	DOI 10.1373/clinchem.2011.167361
NR 102
TC 268
Z9 277
U1 32
U2 368
PU TAYLOR & FRANCIS INC
PI PHILADELPHIA
PA 530 WALNUT STREET	STE 850	PHILADELPHIA	PA 19106 USA
SN 1040-8398
EI 1549-7852
J9 CRIT REV FOOD SCI
JI Crit. Rev. Food Sci. Nutr.
PY 2017
VL 57
IS 8
BP 1729
EP 1741
DI 10.1080/10408398.2015.1030064
PG 13
WC Food Science & Technology; Nutrition & Dietetics
WE Science Citation Index Expanded (SCI-EXPANDED)
SC Food Science & Technology; Nutrition & Dietetics
GA EO6BU
UT WOS:000396777500017
PM 26192537
OA hybrid
DA 2023-09-03
ER
PT J
AU Gaudet	AD
Popovich	PG
Ramer	MS
AF Gaudet	Andrew D.
Popovich	Phillip G.
Ramer	Matt S.
TI Wallerian degeneration: Gaining perspective on inflammatory events after
peripheral nerve injury
SO JOURNAL OF NEUROINFLAMMATION
LA English
DT Review
DE Macrophage; microglia; axotomy; Wallerian degeneration; phagocytosis;
neuroinflammation; inflammation; spinal cord injury; galectin-1
ID SPINAL-CORD-INJURY; RAT SCIATIC-NERVE; LEUKEMIA INHIBITORY FACTOR;
MONOCYTE CHEMOATTRACTANT PROTEIN-1; SCHWANN-CELL DENERVATION;
REGENERATION IN-VIVO; AXON REGENERATION; MYELIN PHAGOCYTOSIS; NEURITE
OUTGROWTH; MESSENGER-RNA
AB In this review	we first provide a brief historical perspective	discussing how peripheral nerve injury (PNI) may have caused World War I. We then consider the initiation	progression	and resolution of the cellular inflammatory response after PNI	before comparing the PNI inflammatory response with that induced by spinal cord injury (SCI). In contrast with central nervous system (CNS) axons	those in the periphery have the remarkable ability to regenerate after injury. Nevertheless	peripheral nervous system (PNS) axon regrowth is hampered by nerve gaps created by injury. In addition	the growth-supportive milieu of PNS axons is not sustained over time	precluding long-distance regeneration. Therefore	studying PNI could be instructive for both improving PNS regeneration and recovery after CNS injury. In addition to requiring a robust regenerative response from the injured neuron itself	successful axon regeneration is dependent on the coordinated efforts of non-neuronal cells which release extracellular matrix molecules	cytokines	and growth factors that support axon regrowth. The inflammatory response is initiated by axonal disintegration in the distal nerve stump: this causes blood-nerve barrier permeabilization and activates nearby Schwann cells and resident macrophages via receptors sensitive to tissue damage. Denervated Schwann cells respond to injury by shedding myelin	proliferating	phagocytosing debris	and releasing cytokines that recruit blood-borne monocytes/macrophages. Macrophages take over the bulk of phagocytosis within days of PNI	before exiting the nerve by the circulation once remyelination has occurred. The efficacy of the PNS inflammatory response (although transient) stands in stark contrast with that of the CNS	where the response of nearby cells is associated with inhibitory scar formation	quiescence	and degeneration/apoptosis. Rather than efficiently removing debris before resolving the inflammatory response as in other tissues	macrophages infiltrating the CNS exacerbate cell death and damage by releasing toxic pro-inflammatory mediators over an extended period of time. Future research will help determine how to manipulate PNS and CNS inflammatory responses in order to improve tissue repair and functional recovery.
C1 [Gaudet	Andrew D.; Popovich	Phillip G.] Ohio State Univ	Coll Med	Dept Neurosci	Columbus	OH 43210 USA.
[Gaudet	Andrew D.; Popovich	Phillip G.] Ohio State Univ	Ctr Brain & Spinal Cord Repair	Coll Med	Columbus	OH 43210 USA.
[Gaudet	Andrew D.; Ramer	Matt S.] Univ British Columbia	ICORD	Vancouver Coastal Hlth Res Inst	Vancouver	BC V5T 1M9	Canada.
[Gaudet	Andrew D.; Ramer	Matt S.] Univ British Columbia	Dept Zool	Vancouver	BC V5T 1M9	Canada.
C3 University System of Ohio; Ohio State University; University System of
Ohio; Ohio State University; University of British Columbia; Vancouver
Coastal Health Research Institute; University of British Columbia
RP Gaudet	AD (corresponding author)	Ohio State Univ	Coll Med	Dept Neurosci	770 Biomed Res Tower	460 W 12th Ave	Columbus	OH 43210 USA.
EM andrew.gaudet@osumc.edu
OI Gaudet	Andrew D./0000-0001-8828-1553
FU Canadian Institutes of Health Research (CIHR); National Sciences and
Engineering Council of Canada (NSERC); Michael Smith Foundation for
Health Research (MSFHR); Rick Hansen Man in Motion Fund; Ray W.
Poppleton Endowment; National Institutes of Health (NIH)
FX ADG is currently supported by a Canadian Institutes of Health Research
(CIHR) Fellowship. This manuscript arises from ADG's doctoral work
which was supported by National Sciences and Engineering Council of
Canada (NSERC)	Michael Smith Foundation for Health Research (MSFHR)
and the Rick Hansen Man in Motion Fund. PGP is supported by The Ray W.
Poppleton Endowment and the National Institutes of Health (NIH). MSR is
supported by a CIHR New Investigator Award and a MSFHR Senior Scholar
Career Award.
CR Abe N	2008	CURR OPIN NEUROBIOL	V18	P276	DOI 10.1016/j.conb.2008.06.005
ALFRED RH	1986	IOWA ORTHOPAEDIC J	V6	P87
Almad A	2011	NEUROTHERAPEUTICS	V8	P262	DOI 10.1007/s13311-011-0033-5
Babetto E	2010	J NEUROSCI	V30	P13291	DOI 10.1523/JNEUROSCI.1189-10.2010
BANNER LR	1994	P NATL ACAD SCI USA	V91	P7109	DOI 10.1073/pnas.91.15.7109
BARRES BA	1993	DEVELOPMENT	V118	P283
Barrette B	2008	J NEUROSCI	V28	P9363	DOI 10.1523/JNEUROSCI.1447-08.2008
Beahrs T	2010	EXP NEUROL	V221	P225	DOI 10.1016/j.expneurol.2009.11.003
BECERRA JL	1995	AM J NEURORADIOL	V16	P125
Beirowski B	2005	BMC NEUROSCI	V6	DOI 10.1186/1471-2202-6-6
Bellail AC	2004	INT J BIOCHEM CELL B	V36	P1046	DOI 10.1016/j.biocel.2004.01.013
BEUCHE W	1984	J NEUROCYTOL	V13	P767	DOI 10.1007/BF01148493
BISBY MA	1990	BRAIN RES	V530	P117	DOI 10.1016/0006-8993(90)90666-Y
Boivin A	2007	J NEUROSCI	V27	P12565	DOI 10.1523/JNEUROSCI.3027-07.2007
BOLIN LM	1995	J NEUROCHEM	V64	P850
BONNEKOH PGH	1989	J NEUROPATH EXP NEUR	V48	P140
BOULDIN TW	1991	J NEUROPATH EXP NEUR	V50	P719	DOI 10.1097/00005072-199111000-00004
Bourde O	1996	J NEUROIMMUNOL	V69	P135
Bruck W	1996	J NEUROSCI RES	V46	P477
BRUCK W	1990	ACTA NEUROPATHOL	V80	P415
BRUCK W	1991	J NEUROL SCI	V103	P182	DOI 10.1016/0022-510X(91)90162-Z
Bruck W	1997	BRAIN PATHOL	V7	P741	DOI 10.1111/j.1750-3639.1997.tb01060.x
Brunn GJ	2005	FASEB J	V19	P872	DOI 10.1096/fj.04-3211fje
Buss A	2004	BRAIN	V127	P34	DOI 10.1093/brain/awh001
Cafferty WBJ	2004	J NEUROSCI	V24	P4432	DOI 10.1523/JNEUROSCI.2245-02.2004
Cajal S.R.Y.	1991	CAJALS DEGENERATION
Campana WM	2007	BRAIN BEHAV IMMUN	V21	P522	DOI 10.1016/j.bbi.2006.12.008
Cao ZX	2006	J NEUROSCI	V26	P5565	DOI 10.1523/JNEUROSCI.0815-06.2006
Casha S	2001	NEUROSCIENCE	V103	P203	DOI 10.1016/S0306-4522(00)00538-8
CHAUDHRY V	1992	MUSCLE NERVE	V15	P687	DOI 10.1002/mus.880150610
Chen MS	2000	NATURE	V403	P434	DOI 10.1038/35000219
Chen ZL	2003	J CELL BIOL	V163	P889	DOI 10.1083/jcb.200307068
Chen ZL	2007	ANNU REV NEUROSCI	V30	P209	DOI 10.1146/annurev.neuro.30.051606.094337
Coleman MP	2010	ANNU REV NEUROSCI	V33	P245	DOI 10.1146/annurev-neuro-060909-153248
Colognato H	2005	TRENDS NEUROSCI	V28	P480	DOI 10.1016/j.tins.2005.07.004
Conforti L	2000	P NATL ACAD SCI USA	V97	P11377	DOI 10.1073/pnas.97.21.11377
Crowe MJ	1997	NAT MED	V3	P73	DOI 10.1038/nm0197-73
Davies SJA	1999	J NEUROSCI	V19	P5810	DOI 10.1523/JNEUROSCI.19-14-05810.1999
Dedkov EI	2002	ACTA NEUROPATHOL	V103	P565	DOI 10.1007/s00401-001-0504-6
DIAMOND J	1987	P NATL ACAD SCI USA	V84	P6596	DOI 10.1073/pnas.84.18.6596
DIAMOND J	1992	J NEUROSCI	V12	P1467
Dougherty KD	2000	NEUROBIOL DIS	V7	P574	DOI 10.1006/nbdi.2000.0318
Fawcett JW	2006	J NEUROTRAUM	V23	P371	DOI 10.1089/neu.2006.23.371
Fenrich K	2004	CAN J NEUROL SCI	V31	P142	DOI 10.1017/S0317167100053798
Fricker FR	2011	J NEUROSCI	V31	P3225	DOI 10.1523/JNEUROSCI.2568-10.2011
Fry EJ	2007	NEURON	V53	P649	DOI 10.1016/j.neuron.2007.02.009
Fu SY	1997	MOL NEUROBIOL	V14	P67	DOI 10.1007/BF02740621
Gardiner NJ	2005	MOL CELL NEUROSCI	V28	P229	DOI 10.1016/j.mcn.2004.08.017
Gaudet AD	2005	CURR DRUG TARGETS	V6	P419	DOI 10.2174/1389450054021864
Gaudet AD	2009	EXP NEUROL	V220	P320	DOI 10.1016/j.expneurol.2009.09.007
Gensel JC	2009	J NEUROSCI	V29	P3956	DOI 10.1523/JNEUROSCI.3992-08.2009
GEORGE EB	1995	J NEUROSCI	V15	P6445
GILLIATT RW	1972	J NEUROL NEUROSUR PS	V35	P335	DOI 10.1136/jnnp.35.3.335
Gitik M	2011	J NEUROINFLAMM	V8	DOI 10.1186/1742-2094-8-24
Gladson CL	1999	J NEUROPATH EXP NEUR	V58	P1029	DOI 10.1097/00005072-199910000-00001
GLASS JD	1993	J NEUROCYTOL	V22	P311	DOI 10.1007/BF01195555
Goethals S	2010	GLIA	V58	P1701	DOI 10.1002/glia.21041
GrandPre T	2000	NATURE	V403	P439	DOI 10.1038/35000226
Gray M	2007	J NEUROSCI RES	V85	P766	DOI 10.1002/jnr.21166
Griffin JW	2008	GLIA	V56	P1518	DOI 10.1002/glia.20778
Griffin John W.	1995	P375
Guertin AD	2005	J NEUROSCI	V25	P3478	DOI 10.1523/JNEUROSCI.3766-04.2005
Hermanns S	2001	RESTOR NEUROL NEUROS	V19	P139
HEUMANN R	1987	P NATL ACAD SCI USA	V84	P8735	DOI 10.1073/pnas.84.23.8735
Hikawa N	1996	CELL MOL NEUROBIOL	V16	P517	DOI 10.1007/BF02150231
Hirata K	1999	J NEUROCYTOL	V28	P685	DOI 10.1023/A:1007012916530
HOLTZMAN E	1965	J CELL BIOL	V27	P651	DOI 10.1083/jcb.27.3.651
Horie H	1999	J NEUROSCI	V19	P9964
Horie H	2004	J NEUROSCI	V24	P1873	DOI 10.1523/JNEUROSCI.4483-03.2004
Huang JK	2005	SCIENCE	V310	P1813	DOI 10.1126/science.1118313
Jain V	2005	MED HYPOTHESES	V65	P185	DOI 10.1016/j.mehy.2004.12.027
JOBE MT	2007	CAMPBELLS OPERATIVE
Karanth S	2006	EXP NEUROL	V202	P161	DOI 10.1016/j.expneurol.2006.05.024
Kariko K	2004	J BIOL CHEM	V279	P12542	DOI 10.1074/jbc.M310175200
Kennedy AD	2009	IMMUNOL RES	V43	P25	DOI 10.1007/s12026-008-8049-6
Kerschensteiner M	2005	NAT MED	V11	P572	DOI 10.1038/nm1229
Kigerl KA	2009	J NEUROSCI	V29	P13435	DOI 10.1523/JNEUROSCI.3257-09.2009
Kuhlmann T	2001	J NEUROSCI	V21	P3401	DOI 10.1523/JNEUROSCI.21-10-03401.2001
Kurek JB	1996	NEUROMUSCULAR DISORD	V6	P105	DOI 10.1016/0960-8966(95)00029-1
LaFleur M	1996	J EXP MED	V184	P2311
Langley JN	1917	J PHYSIOL-LONDON	V51	P318
Laskin DL	2009	CHEM RES TOXICOL	V22	P1376	DOI 10.1021/tx900086v
Lee HK	2009	GLIA	V57	P1825	DOI 10.1002/glia.20894
Lee H	2006	BIOCHEM BIOPH RES CO	V350	P742	DOI 10.1016/j.bbrc.2006.09.108
Lee JK	2010	J NEUROSCI	V30	P10899	DOI 10.1523/JNEUROSCI.2269-10.2010
Lee JK	2010	NEURON	V66	P663	DOI 10.1016/j.neuron.2010.05.002
Li H	1997	GLIA	V20	P333	DOI 10.1002/(SICI)1098-1136(199708)20:4<333::AID-GLIA6>3.0.CO;2-6
LIU HM	1995	J NEUROPATH EXP NEUR	V54	P487	DOI 10.1097/00005072-199507000-00002
Liu L	1999	J PERIPHER NERV SYST	V4	P123
London CA	1998	VET IMMUNOL IMMUNOP	V63	P37	DOI 10.1016/S0165-2427(98)00080-4
LU X	1991	J NEUROSCI	V11	P972
LUBINSKA L	1977	BRAIN RES	V130	P47	DOI 10.1016/0006-8993(77)90841-1
LUDWIN SK	1990	ACTA NEUROPATHOL	V80	P266	DOI 10.1007/BF00294644
Luk HW	2003	J NEUROSCI RES	V73	P644	DOI 10.1002/jnr.10701
LUNN ER	1989	EUR J NEUROSCI	V1	P27	DOI 10.1111/j.1460-9568.1989.tb00771.x
LUTTGES MW	1976	EXP NEUROL	V50	P706	DOI 10.1016/0014-4886(76)90039-X
Mack TGA	2001	NAT NEUROSCI	V4	P1199	DOI 10.1038/nn770
Mahanthappa NK	1996	J NEUROSCI	V16	P4673
Malik RKJ	2009	GLYCOBIOLOGY	V19	P1402	DOI 10.1093/glycob/cwp077
Markus A	2002	CURR OPIN NEUROBIOL	V12	P523	DOI 10.1016/S0959-4388(02)00372-0
Martini R	2008	GLIA	V56	P1566	DOI 10.1002/glia.20766
McGraw J	2004	EUR J NEUROSCI	V20	P2872	DOI 10.1111/j.1460-9568.2004.03802.x
MCKEON RJ	1991	J NEUROSCI	V11	P3398
Medzhitov R	2001	NAT REV IMMUNOL	V1	P135	DOI 10.1038/35100529
MILEDI R	1970	J PHYSIOL-LONDON	V207	P507	DOI 10.1113/jphysiol.1970.sp009076
Mizisin AP	2011	ACTA NEUROPATHOL	V121	P291	DOI 10.1007/s00401-010-0783-x
Moalem G	2004	NEUROSCIENCE	V129	P767	DOI 10.1016/j.neuroscience.2004.08.035
MOSMANN TR	1986	J IMMUNOL	V136	P2348
Mosser DM	2008	NAT REV IMMUNOL	V8	P958	DOI 10.1038/nri2448
Mueller M	2003	LAB INVEST	V83	P175	DOI 10.1097/01.LAB.0000056993.28149.BF
Mueller M	2001	AM J PATHOL	V159	P2187	DOI 10.1016/S0002-9440(10)63070-2
Murinson BB	2005	J NEUROSCI	V25	P1179	DOI 10.1523/JNEUROSCI.1372-04.2005
MURPHY PG	1995	J NEUROSCI	V15	P5130
Nathan C	2006	NAT REV IMMUNOL	V6	P173	DOI 10.1038/nri1785
Nikolaeva MA	2005	J NEUROSCI	V25	P9960	DOI 10.1523/JNEUROSCI.2003-05.2005
Nodari A	2008	J NEUROSCI	V28	P6714	DOI 10.1523/JNEUROSCI.0326-08.2008
OBER WB	1992	YALE J BIOL MED	V65	P201
OLSSON Y	1968	ACTA NEUROPATHOL	V10	P26	DOI 10.1007/BF00690507
Orozco OE	2001	EUR J NEUROSCI	V13	P2177	DOI 10.1046/j.0953-816x.2001.01596.x
Patton BL	1997	J CELL BIOL	V139	P1507	DOI 10.1083/jcb.139.6.1507
PELLEGRINO RG	1986	J NEUROCYTOL	V15	P17	DOI 10.1007/BF02057901
Perkins NM	2000	NEUROSCIENCE	V101	P745	DOI 10.1016/S0306-4522(00)00396-1
PERRY VH	1995	EUR J NEUROSCI	V7	P271	DOI 10.1111/j.1460-9568.1995.tb01063.x
PERRY VH	1992	EUR J NEUROSCI	V4	P1000	DOI 10.1111/j.1460-9568.1992.tb00126.x
PERRY VH	1987	J EXP MED	V165	P1218	DOI 10.1084/jem.165.4.1218
Pineau I	2009	GLIA	V57	P351	DOI 10.1002/glia.20763
Popovich PG	1996	EXP NEUROL	V142	P258	DOI 10.1006/exnr.1996.0196
Ribardo DA	2001	J BIOL CHEM	V276	P5467	DOI 10.1074/jbc.M006690200
Scott ALM	2010	BRAIN	V133	P421	DOI 10.1093/brain/awp316
SEDDON HJ	1947	BRIT J SURG	V35	P151	DOI 10.1002/bjs.18003513808
Shamash S	2002	J NEUROSCI	V22	P3052	DOI 10.1523/JNEUROSCI.22-08-03052.2002
Shen ZL	2000	MICROSURG	V20	P255	DOI 10.1002/1098-2752(2000)20:5<255::AID-MICR6>3.0.CO;2-A
Shim S	2010	EXP NEUROL	V223	P38	DOI 10.1016/j.expneurol.2009.10.001
Shubayev VI	2006	MOL CELL NEUROSCI	V31	P407	DOI 10.1016/j.mcn.2005.10.011
Sica A	2006	EUR J CANCER	V42	P717	DOI 10.1016/j.ejca.2006.01.003
Siebert H	2000	J NEUROIMMUNOL	V110	P177	DOI 10.1016/S0165-5728(00)00343-X
Sievers C	2003	NEUROSCI RES	V46	P161	DOI 10.1016/S0168-0102(03)00039-7
Smith CE	2001	MICROSURG	V21	P290	DOI 10.1002/micr.1055
Snider WD	2002	NEURON	V35	P13	DOI 10.1016/S0896-6273(02)00762-6
Stirling DP	2010	TRENDS MOL MED	V16	P160	DOI 10.1016/j.molmed.2010.02.002
Stoll G	2002	J PERIPHER NERV SYST	V7	P13	DOI 10.1046/j.1529-8027.2002.02002.x
STOLL G	1989	J NEUROCYTOL	V18	P671	DOI 10.1007/BF01187086
Subang MC	2001	EUR J NEUROSCI	V13	P521	DOI 10.1046/j.1460-9568.2001.01425.x
Sulaiman OAR	2002	GLIA	V37	P206	DOI 10.1002/glia.10022
Sulaiman OAR	2000	GLIA	V32	P234	DOI 10.1002/1098-1136(200012)32:3<234::AID-GLIA40>3.0.CO;2-3
Tofaris GK	2002	J NEUROSCI	V22	P6696
Touma E	2007	EUR J NEUROSCI	V26	P3368	DOI 10.1111/j.1460-9568.2007.05943.x
TRAPP BD	1988	J NEUROSCI	V8	P3515
Trigueros SDA	2003	MOL CELL NEUROSCI	V24	P753	DOI 10.1016/S1044-7431(03)00241-0
Tsao JW	1999	J NEUROSCI	V19	P4718
Vabulas RM	2001	J BIOL CHEM	V276	P31332	DOI 10.1074/jbc.M103217200
Vallieres N	2006	GLIA	V53	P103	DOI 10.1002/glia.20266
Vargas ME	2007	ANNU REV NEUROSCI	V30	P153	DOI 10.1146/annurev.neuro.30.051606.094354
Vargas ME	2010	P NATL ACAD SCI USA	V107	P11993	DOI 10.1073/pnas.1001948107
VASS K	1993	LAB INVEST	V69	P275
VAUGHN JE	1970	J COMP NEUROL	V140	P207	DOI 10.1002/cne.901400205
Waller A	1850	PHILOS T R SOC LOND	V140	P423	DOI DOI 10.1098/RSTL.1850.0021
Wallquist W	2002	J COMP NEUROL	V454	P284	DOI 10.1002/cne.10434
Wang MS	2004	BRAIN	V127	P671	DOI 10.1093/brain/awh078
WEERASURIYA A	1992	BRAIN RES	V581	P327	DOI 10.1016/0006-8993(92)90727-Q
Weerasuriya A	2011	METHODS MOL BIOL	V686	P149	DOI 10.1007/978-1-60761-938-3_6
Whetstone WD	2003	J NEUROSCI RES	V74	P227	DOI 10.1002/jnr.10759
WHITE FV	1989	J NEUROCHEM	V52	P1085	DOI 10.1111/j.1471-4159.1989.tb01851.x
Woodhall B	1956	PERIPHERAL NERVE REG
Xin JP	2011	BRAIN BEHAV IMMUN	V25	P820	DOI 10.1016/j.bbi.2010.08.004
Yiu G	2006	NAT REV NEUROSCI	V7	P617	DOI 10.1038/nrn1956
Zhai QW	2003	NEURON	V39	P217	DOI 10.1016/S0896-6273(03)00429-X
Zheng BH	2005	P NATL ACAD SCI USA	V102	P1205	DOI 10.1073/pnas.0409026102
ZU HGM	2008	MUSCLE NERVE	V37	P3
NR 169
TC 561
Z9 582
U1 4
U2 155
PU BMC
PI LONDON
PA CAMPUS	4 CRINAN ST	LONDON N1 9XW	ENGLAND
SN 1742-2094
J9 J NEUROINFLAMM
JI J. Neuroinflamm.
PD AUG 30
PY 2011
VL 8
AR 110
DI 10.1186/1742-2094-8-110
PG 13
WC Immunology; Neurosciences
WE Science Citation Index Expanded (SCI-EXPANDED)
SC Immunology; Neurosciences & Neurology
GA 828PG
UT WOS:000295513800002
PM 21878126
OA Green Published	gold
DA 2023-09-03
ER
PT J
AU Zhao	SC
Ma	LS
Chu	ZH
Xu	H
Wu	WQ
Liu	FD
AF Zhao	Shou-cai
Ma	Ling-song
Chu	Zhao-hu
Xu	Heng
Wu	Wen-qian
Liu	Fudong
TI Regulation of microglial activation in stroke
SO ACTA PHARMACOLOGICA SINICA
LA English
DT Review
DE cerebral ischemia; microglia; macrophage; neuroinflammation; cytokines;
microglia/neuron interaction; brain
ID FOCAL CEREBRAL-ISCHEMIA; CENTRAL-NERVOUS-SYSTEM; SPINAL-CORD-INJURY;
MEDIATED INFLAMMATORY RESPONSE; CRITICAL TRANSCRIPTION FACTOR;
TUMOR-NECROSIS-FACTOR; TOLL-LIKE RECEPTORS; ALTERNATIVE ACTIVATION;
MACROPHAGE POLARIZATION; BRAIN-INJURY
AB When ischemic stroke occurs	oxygen and energy depletion triggers a cascade of events	including inflammatory responses	glutamate excitotoxicity	oxidative stress	and apoptosis that result in a profound brain injury. The inflammatory response contributes to secondary neuronal damage	which exerts a substantial impact on both acute ischemic injury and the chronic recovery of the brain function. Microglia are the resident immune cells in the brain that constantly monitor brain microenvironment under normal conditions. Once ischemia occurs	microglia are activated to produce both detrimental and neuroprotective mediators	and the balance of the two counteracting mediators determines the fate of injured neurons. The activation of microglia is defined as either classic (M1) or alternative (M2): M1 microglia secrete pro-inflammatory cytokines (TNF alpha	IL-23	IL-1 beta	IL-12	etc) and exacerbate neuronal injury	whereas the M2 phenotype promotes anti-inflammatory responses that are reparative. It has important translational value to regulate M1/M2 microglial activation to minimize the detrimental effects and/or maximize the protective role. Here	we discuss various regulators of microglia/macrophage activation and the interaction between microglia and neurons in the context of ischemic stroke.
C1 [Zhao	Shou-cai; Ma	Ling-song; Chu	Zhao-hu; Xu	Heng; Wu	Wen-qian] Wannan Med Coll	Yijishan Hosp	Dept Neurol	Wuhu 241001	Peoples R China.
[Liu	Fudong] Univ Texas Hlth Sci Ctr Houston	McGovern Med Sch	Dept Neurol	Houston	TX 77030 USA.
C3 Wannan Medical College; University of Texas System; University of Texas
Health Science Center Houston
RP Liu	FD (corresponding author)	Univ Texas Hlth Sci Ctr Houston	McGovern Med Sch	Dept Neurol	Houston	TX 77030 USA.
EM Fudong.Liu@uth.tmc.edu
FU National Natural Science Foundation of China [81371295]
FX This work was supported by the National Natural Science Foundation of
China (grant 81371295).
CR Alexander M	2003	ACTA NEUROPATHOL	V105	P420	DOI 10.1007/s00401-002-0658-x
[Anonymous]	2014	J BOT
Beutler B	2004	NATURE	V430	P257	DOI 10.1038/nature02761
Biber K	2008	J NEUROIMMUNOL	V198	P69	DOI 10.1016/j.jneuroim.2008.04.012
Blanco JCG	2000	J EXP MED	V191	P2131	DOI 10.1084/jem.191.12.2131
Cao CX	2007	BIOCHEM BIOPH RES CO	V353	P509	DOI 10.1016/j.bbrc.2006.12.057
Cao L	2013	NEUROSCI BULL	V29	P189	DOI 10.1007/s12264-013-1324-0
Cardona AE	2006	NAT NEUROSCI	V9	P917	DOI 10.1038/nn1715
Chan WY	2007	BRAIN RES REV	V53	P344	DOI 10.1016/j.brainresrev.2006.11.002
Chen Y	2014	CURR MED CHEM	V21	P2146	DOI 10.2174/0929867321666131228203906
Chitnis T	2007	AM J PATHOL	V170	P1695	DOI 10.2353/ajpath.2007.060677
Churchward MA	2014	MOL BRAIN	V7	DOI 10.1186/s13041-014-0085-7
Cox FF	2012	BRAIN BEHAV IMMUN	V26	P789	DOI 10.1016/j.bbi.2011.10.004
Crocker PR	2007	NAT REV IMMUNOL	V7	P255	DOI 10.1038/nri2056
Cuesta N	2003	J IMMUNOL	V170	P5739	DOI 10.4049/jimmunol.170.11.5739
Davalos D	2005	NAT NEUROSCI	V8	P752	DOI 10.1038/nn1472
Davenport CM	2010	J NEUROCHEM	V112	P552	DOI 10.1111/j.1471-4159.2009.06485.x
Daws MR	2003	J IMMUNOL	V171	P594	DOI 10.4049/jimmunol.171.2.594
de Haas AH	2007	MOL NEUROBIOL	V36	P137	DOI 10.1007/s12035-007-0036-8
Denieffe S	2013	BRAIN BEHAV IMMUN	V34	P86	DOI 10.1016/j.bbi.2013.07.174
Eguchi J	2013	DIABETES	V62	P3394	DOI 10.2337/db12-1327
El Chartouni C	2010	IMMUNOBIOLOGY	V215	P821	DOI 10.1016/j.imbio.2010.05.031
Elser B	2002	IMMUNITY	V17	P703	DOI 10.1016/S1074-7613(02)00471-5
Escalante CR	1998	NATURE	V391	P103	DOI 10.1038/34224
Ferrini F	2013	NEURAL PLAST	V2013	DOI 10.1155/2013/429815
Flo TH	2004	NATURE	V432	P917	DOI 10.1038/nature03104
Foussias G	2001	BIOCHEM BIOPH RES CO	V284	P887	DOI 10.1006/bbrc.2001.5052
Galea J	2012	J NEUROCHEM	V121	P785	DOI 10.1111/j.1471-4159.2012.07716.x
Ginhoux F	2010	SCIENCE	V330	P841	DOI 10.1126/science.1194637
Goethals S	2010	GLIA	V58	P1701	DOI 10.1002/glia.21041
Gordon S	2005	NAT REV IMMUNOL	V5	P953	DOI 10.1038/nri1733
Gordon S	2003	NAT REV IMMUNOL	V3	P23	DOI 10.1038/nri978
Gregersen R	2000	J CEREBR BLOOD F MET	V20	P53	DOI 10.1097/00004647-200001000-00009
Gunthner R	2013	MEDIAT INFLAMM	V2013	DOI 10.1155/2013/731023
Guglielmetti C	2016	GLIA	V64	P2181	DOI 10.1002/glia.23053
Gulyas B	2012	J NEUROL SCI	V320	P110	DOI 10.1016/j.jns.2012.06.026
Guo S	2014	CELL DEATH DIFFER	V21	P888	DOI 10.1038/cdd.2014.9
Guo Y	2013	NEUROSCIENCE	V238	P1	DOI 10.1016/j.neuroscience.2013.01.047
Han KJ	2008	BIOCHEM BIOPH RES CO	V372	P772	DOI 10.1016/j.bbrc.2008.05.103
Han QD	2014	BRAIN RES	V1542	P176	DOI 10.1016/j.brainres.2013.10.026
Hegyi B	2014	STEM CELLS DEV	V23	P2600	DOI 10.1089/scd.2014.0088
Henn A	2011	J IMMUNOL	V186	P3237	DOI 10.4049/jimmunol.1002787
Hernangomez M	2012	GLIA	V60	P1437	DOI 10.1002/glia.22366
Horiuchi M	2012	J NEUROINFLAMM	V9	DOI 10.1186/1742-2094-9-227
Hu XM	2012	STROKE	V43	P3063	DOI 10.1161/STROKEAHA.112.659656
Hua F	2009	BRAIN RES	V1262	P100	DOI 10.1016/j.brainres.2009.01.018
Huang LH	2015	BIOMED RES INT	V2015	DOI 10.1155/2015/864509
Iadecola C	1999	J EXP MED	V189	P719	DOI 10.1084/jem.189.4.719
Iadecola C	2011	NAT MED	V17	P796	DOI 10.1038/nm.2399
Jack CS	2007	J NEUROPATH EXP NEUR	V66	P848	DOI 10.1097/nen.0b013e3181492a7
Jack CS	2005	J IMMUNOL	V175	P4320	DOI 10.4049/jimmunol.175.7.4320
Jadhav SP	2014	J NEUROCHEM	V130	P388	DOI 10.1111/jnc.12731
Jang E	2013	FASEB J	V27	P1176	DOI 10.1096/fj.12-222257
Jayadev S	2011	GLIA	V59	P1402	DOI 10.1002/glia.21178
Jellusova J	2012	FRONT IMMUNOL	V2	DOI 10.3389/fimmu.2011.00096
Jiang R	2014	J IMMUNOL RES	V2014	DOI 10.1155/2014/787023
Jimenez S	2008	J NEUROSCI	V28	P11650	DOI 10.1523/JNEUROSCI.3024-08.2008
Jin Q	2014	BRAIN BEHAV IMMUN	V40	P131	DOI 10.1016/j.bbi.2014.03.003
Jung DY	2005	J IMMUNOL	V174	P6467	DOI 10.4049/jimmunol.174.10.6467
Jung YS	2016	ACTA PHARMACOL SIN	V37	P1031	DOI 10.1038/aps.2016.51
Kawabori M	2015	J NEUROSCI	V35	P3384	DOI 10.1523/JNEUROSCI.2620-14.2015
Kehrer JP	2010	CELL BIOL TOXICOL	V26	P83	DOI 10.1007/s10565-009-9119-9
Keir ME	2008	ANNU REV IMMUNOL	V26	P677	DOI 10.1146/annurev.immunol.26.021607.090331
Kettenmann H	2011	PHYSIOL REV	V91	P461	DOI 10.1152/physrev.00011.2010
Kilic U	2008	NEUROBIOL DIS	V31	P33	DOI 10.1016/j.nbd.2008.03.002
Kjeldsen L	2000	BBA-PROTEIN STRUCT M	V1482	P272	DOI 10.1016/S0167-4838(00)00152-7
Kopp E	2003	CURR OPIN IMMUNOL	V15	P396	DOI 10.1016/S0952-7915(03)00080-3
Korczeniewska J	2013	MOL CELL BIOL	V33	P1124	DOI 10.1128/MCB.00802-12
Kreutzberg GW	1996	TRENDS NEUROSCI	V19	P312	DOI 10.1016/0166-2236(96)10049-7
Lajaunias F	2005	EUR J IMMUNOL	V35	P243	DOI 10.1002/eji.200425273
Lana D	2014	FRONT AGING NEUROSCI	V6	DOI 10.3389/fnagi.2014.00322
Lawrence T	2011	NAT REV IMMUNOL	V11	P750	DOI 10.1038/nri3088
Lehnardt S	2010	GLIA	V58	P253	DOI 10.1002/glia.20928
Lian H	2016	J NEUROSCI	V36	P577	DOI 10.1523/JNEUROSCI.2117-15.2016
Lim H	2013	J BIOL CHEM	V288	P7572	DOI 10.1074/jbc.M112.414904
Liu HC	2012	CELL IMMUNOL	V278	P84	DOI 10.1016/j.cellimm.2012.06.001
Lopes RS	2016	J BIOSCIENCES	V41	P381	DOI 10.1007/s12038-016-9621-1
Lv M	2011	NEUROSCIENCE	V176	P162	DOI 10.1016/j.neuroscience.2010.11.066
Mabuchi T	2000	STROKE	V31	P1735	DOI 10.1161/01.STR.31.7.1735
Maciejewski-Lenoir D	1999	J IMMUNOL	V163	P1628
Martinez FO	2009	ANNU REV IMMUNOL	V27	P451	DOI 10.1146/annurev.immunol.021908.132532
Masuda T	2012	CELL REP	V1	P334	DOI 10.1016/j.celrep.2012.02.014
Miller BA	2007	J NEUROINFLAMM	V4	DOI 10.1186/1742-2094-4-28
Mills CD	2000	J IMMUNOL	V164	P6166	DOI 10.4049/jimmunol.164.12.6166
Minten C	2012	PLOS ONE	V7	DOI 10.1371/journal.pone.0049851
Mott RT	2004	GLIA	V46	P369	DOI 10.1002/glia.20009
Mou CZ	2015	J MOL NEUROSCI	V55	P69	DOI 10.1007/s12031-014-0315-6
Mu SH	2016	NEUROCHEM RES	V41	P707	DOI 10.1007/s11064-015-1739-2
NATHAN CF	1983	J EXP MED	V158	P670	DOI 10.1084/jem.158.3.670
Negishi H	2006	P NATL ACAD SCI USA	V103	P15136	DOI 10.1073/pnas.0607181103
Nhu QM	2006	J ENDOTOXIN RES	V12	P285	DOI 10.1179/096805106X118834
Nielsen BS	1996	GUT	V38	P414	DOI 10.1136/gut.38.3.414
Nimmerjahn A	2005	SCIENCE	V308	P1314	DOI 10.1126/science.1110647
Ohtaki H	2008	P NATL ACAD SCI USA	V105	P14638	DOI 10.1073/pnas.0803670105
Okazaki T	2006	TRENDS IMMUNOL	V27	P195	DOI 10.1016/j.it.2006.02.001
Olson JK	2004	J IMMUNOL	V173	P3916	DOI 10.4049/jimmunol.173.6.3916
Oshima S	2004	MOL CELL BIOL	V24	P6298	DOI 10.1128/MCB.24.14.6298-6310.2004
Pan J	2015	J NEUROINFLAMM	V12	DOI 10.1186/s12974-015-0270-3
Pannell M	2014	GLIA	V62	P667	DOI 10.1002/glia.22633
Paolicelli RC	2011	NEURON GLIA BIOL	V7	P77	DOI 10.1017/S1740925X12000105
Patel Anita R	2013	Int J Physiol Pathophysiol Pharmacol	V5	P73
Perego C	2013	JOVE-J VIS EXP	DOI 10.3791/50605
Perego C	2011	J NEUROINFLAMM	V8	DOI 10.1186/1742-2094-8-174
Perry VH	2013	SEMIN IMMUNOPATHOL	V35	P601	DOI 10.1007/s00281-013-0382-8
Perry VH	2010	NAT REV NEUROL	V6	P193	DOI 10.1038/nrneurol.2010.17
Peterson JW	2002	J NEUROPATH EXP NEUR	V61	P539	DOI 10.1093/jnen/61.6.539
Petrovic-Djergovic D	2016	CIRC RES	V119	P142	DOI 10.1161/CIRCRESAHA.116.308022
Phulwani NK	2008	J IMMUNOL	V181	P3841	DOI 10.4049/jimmunol.181.6.3841
Pillai S	2012	ANNU REV IMMUNOL	V30	P357	DOI 10.1146/annurev-immunol-020711-075018
Pisanu A	2014	NEUROBIOL DIS	V71	P280	DOI 10.1016/j.nbd.2014.08.011
Quintas C	2014	J NEUROINFLAMM	V11	DOI 10.1186/s12974-014-0141-3
Rohl C	2007	BRAIN RES	V1129	P43	DOI 10.1016/j.brainres.2006.10.057
Salama AD	2003	J EXP MED	V198	P71	DOI 10.1084/jem.20022119
Samanta J	2010	STROKE	V41	P357	DOI 10.1161/STROKEAHA.109.565523
Satoh Noriko	2010	Diabetes Care	V33	pe7	DOI 10.2337/dc09-1315
Satoh T	2010	NAT IMMUNOL	V11	P936	DOI 10.1038/ni.1920
Schafer DP	2012	NEURON	V74	P691	DOI 10.1016/j.neuron.2012.03.026
Schmid CD	2002	J NEUROCHEM	V83	P1309	DOI 10.1046/j.1471-4159.2002.01243.x
Shin JA	2014	BRAIN BEHAV IMMUN	V40	P143	DOI 10.1016/j.bbi.2014.03.013
Shrivastava K	2012	J COMP NEUROL	V520	P2657	DOI 10.1002/cne.23062
Sieber MW	2013	PLOS ONE	V8	DOI 10.1371/journal.pone.0052982
Siglienti I	2007	J NEUROPATH EXP NEUR	V66	P47	DOI 10.1097/nen.0b013e31802d47b4
Stefano L	2009	J NEUROCHEM	V110	P284	DOI 10.1111/j.1471-4159.2009.06130.x
Stirling DP	2014	BRAIN	V137	P707	DOI 10.1093/brain/awt341
Sun JL	2013	J NEUROSCI RES	V91	P545	DOI 10.1002/jnr.23168
Takahashi K	2005	J EXP MED	V201	P647	DOI 10.1084/jem.20041611
Tanaka T	2015	GLIA	V63	P595	DOI 10.1002/glia.22770
Tang SC	2007	P NATL ACAD SCI USA	V104	P13798	DOI 10.1073/pnas.0702553104
Tang Y	2014	CELL DEATH DIFFER	V21	P369	DOI 10.1038/cdd.2013.159
Tang ZW	2014	J NEUROINFLAMM	V11	DOI 10.1186/1742-2094-11-26
Tarassishin L	2011	J NEUROINFLAMM	V8	DOI 10.1186/1742-2094-8-187
Tarassishin L	2011	GLIA	V59	P1911	DOI 10.1002/glia.21233
Taylor RA	2013	CLIN DEV IMMUNOL	DOI 10.1155/2013/746068
Tu YF	2012	STROKE	V43	P491	DOI 10.1161/STROKEAHA.111.629931
Varki A	2006	GLYCOBIOLOGY	V16	p1R	DOI 10.1093/glycob/cwj008
[truncated: 418,267+ more rows]
[truncated: 35 more columns]
